# Supplementary material for: Synthetic weather diaries: concept and application to Swiss weather in 1816
Source: Copernicus journal article supplement (doi:10.5194/cp-16-1937-2020), 2020-10-21
Supplement: Supplementary file 1 [file cp-16-1937-2020-supplement.zip]

Archive with 5 entries (5 files):
- Aarau_1816_Daily_SyntheticWeatherDiary.csv
- Geneva_1816_Monthly_SyntheticWeatherDiary.csv
- Broennimann_Supplementary_Figure.pdf
- StGall_1816_Daily_SyntheticWeatherDiary.csv
- cp-16-1937-2020-supplement-title-page.pdf
