# Supplementary material for: Synthetic weather diaries: concept and application to Swiss weather in 1816
Source: Copernicus journal article supplement (doi:10.5194/cp-16-1937-2020), 2020-10-21
Supplement: Supplementary file 1 [file cp-16-1937-2020-supplement.zip › Aarau_1816_Daily_SyntheticWeatherDiary.csv]

YR	M	D	JD	T[degC]	dT[degC]	T[sd]	RR[mm/d]	T[text]	RR[text]	SKY[text]	WT	WT[p]	WT[text]
1816	1	1	1	-1.33	-0.94	-0.23	0	normal	dry	cloudy	5	1.00	High Pressure over Europe
1816	1	2	2	-4.32	-3.44	-0.85	0	cold	dry	cloudy	4	0.92	East, indifferent
1816	1	3	3	-3.50	-2.99	-0.73	0	cold	dry	cloudy	1	0.54	Northeast, indifferent
1816	1	4	4	-2.40	-1.00	-0.24	1.16	normal	slight snowfall	cloudy	4	0.95	East, indifferent
1816	1	5	5	-1.78	-0.05	-0.01	0	normal	dry	clear	4	0.49	East, indifferent
1816	1	6	6	-2.38	-1.49	-0.36	0	normal	dry	clear	3	0.98	Westerly flow over Northern Europe
1816	1	7	7	1.31	2.14	0.52	0	warm	dry	clear	7	0.99	Westerly flow over Southern Europe, cyclonic
1816	1	8	8	-2.20	-1.00	-0.24	5.26	normal	snowfall	cloudy	2	1.00	West-SouthWest, cyclonic, flat pressure distribution
1816	1	9	9	2.88	5.18	1.26	0.7	warm	dry	partly cloudy	7	0.99	Westerly flow over Southern Europe, cyclonic
1816	1	10	10	2.62	5.11	1.24	8.09	warm	rain	partly cloudy	7	0.83	Westerly flow over Southern Europe, cyclonic
1816	1	11	11	-0.14	3.69	0.90	6.29	warm	snowfall	partly cloudy	7	1.00	Westerly flow over Southern Europe, cyclonic
1816	1	12	12	-1.88	1.86	0.45	2.77	normal	slight snowfall	partly cloudy	7	1.00	Westerly flow over Southern Europe, cyclonic
1816	1	13	13	2.48	5.78	1.40	1.61	warm	slight rain	partly cloudy	7	1.00	Westerly flow over Southern Europe, cyclonic
1816	1	14	14	-0.29	2.78	0.68	2.53	warm	slight snowfall	partly cloudy	7	1.00	Westerly flow over Southern Europe, cyclonic
1816	1	15	15	1.07	1.48	0.36	4.67	normal	slight snowfall	partly cloudy	7	1.00	Westerly flow over Southern Europe, cyclonic
1816	1	16	16	2.20	3.09	0.75	11.34	warm	rain	cloudy	1	0.46	Northeast, indifferent
1816	1	17	17	-0.48	0.70	0.17	0	normal	dry	clear	3	0.89	Westerly flow over Northern Europe
1816	1	18	18	1.14	0.78	0.19	0	normal	dry	partly cloudy	2	0.98	West-SouthWest, cyclonic, flat pressure distribution
1816	1	19	19	-2.90	-3.09	-0.75	2.58	cold	slight snowfall	partly cloudy	2	0.55	West-SouthWest, cyclonic, flat pressure distribution
1816	1	20	20	-2.72	-3.71	-0.90	0	cold	dry	partly cloudy	2	0.78	West-SouthWest, cyclonic, flat pressure distribution
1816	1	21	21	-1.10	-1.39	-0.34	6.43	normal	snowfall	cloudy	7	0.94	Westerly flow over Southern Europe, cyclonic
1816	1	22	22	-0.14	0.00	0.00	0	normal	dry	cloudy	7	1.00	Westerly flow over Southern Europe, cyclonic
1816	1	23	23	-1.76	-1.51	-0.37	0.07	normal	dry	partly cloudy	7	1.00	Westerly flow over Southern Europe, cyclonic
1816	1	24	24	2.30	4.11	1.00	0	warm	dry	clear	7	0.99	Westerly flow over Southern Europe, cyclonic
1816	1	25	25	2.25	4.67	1.14	0	warm	dry	clear	7	1.00	Westerly flow over Southern Europe, cyclonic
1816	1	26	26	1.56	3.56	0.87	2.53	warm	slight snowfall	partly cloudy	7	1.00	Westerly flow over Southern Europe, cyclonic
1816	1	27	27	1.49	3.31	0.81	0.74	warm	dry	clear	7	0.91	Westerly flow over Southern Europe, cyclonic
1816	1	28	28	-0.30	0.04	0.01	0	normal	dry	partly cloudy	6	0.75	orth, cyclonic
1816	1	29	29	-7.06	-6.52	-1.60	0.21	very cold	dry	clear	1	0.94	Northeast, indifferent
1816	1	30	30	-10.04	-9.51	-2.34	0	very cold	dry	partly cloudy	4	0.65	East, indifferent
1816	1	31	31	-5.37	-3.55	-0.88	0.02	cold	dry	clear	5	0.97	High Pressure over Europe
1816	2	1	32	-9.67	-9.12	-2.25	2.63	very cold	slight snowfall	partly cloudy	5	0.95	High Pressure over Europe
1816	2	2	33	-6.54	-5.29	-1.31	4.3	cold	slight snowfall	cloudy	3	0.44	Westerly flow over Northern Europe
1816	2	3	34	-2.85	-1.69	-0.42	0.75	normal	dry	clear	7	0.96	Westerly flow over Southern Europe, cyclonic
1816	2	4	35	-0.18	0.32	0.08	0	normal	dry	clear	7	1.00	Westerly flow over Southern Europe, cyclonic
1816	2	5	36	0.94	2.53	0.63	34.48	warm	heavy snowfall	partly cloudy	7	1.00	Westerly flow over Southern Europe, cyclonic
1816	2	6	37	-0.91	0.78	0.19	2.63	normal	slight snowfall	partly cloudy	7	1.00	Westerly flow over Southern Europe, cyclonic
1816	2	7	38	2.02	2.34	0.58	11.12	warm	rain	partly cloudy	7	1.00	Westerly flow over Southern Europe, cyclonic
1816	2	8	39	0.28	0.75	0.19	4.22	normal	slight snowfall	partly cloudy	7	1.00	Westerly flow over Southern Europe, cyclonic
1816	2	9	40	-1.57	-2.64	-0.66	0.52	cold	dry	partly cloudy	7	1.00	Westerly flow over Southern Europe, cyclonic
1816	2	10	41	-6.78	-9.26	-2.33	0.01	very cold	dry	clear	7	0.96	Westerly flow over Southern Europe, cyclonic
1816	2	11	42	-4.81	-6.35	-1.60	0	very cold	dry	clear	1	1.00	Northeast, indifferent
1816	2	12	43	-7.01	-7.23	-1.83	0.87	very cold	dry	clear	1	0.94	Northeast, indifferent
1816	2	13	44	-6.46	-5.76	-1.46	0.28	cold	dry	clear	5	0.76	High Pressure over Europe
1816	2	14	45	-2.27	-2.16	-0.55	0.09	cold	dry	clear	5	0.79	High Pressure over Europe
1816	2	15	46	-1.06	-0.78	-0.20	0	normal	dry	clear	5	0.94	High Pressure over Europe
1816	2	16	47	1.52	1.49	0.38	0	normal	dry	partly cloudy	2	0.87	West-SouthWest, cyclonic, flat pressure distribution
1816	2	17	48	3.37	2.44	0.63	5.1	warm	rain	partly cloudy	7	1.00	Westerly flow over Southern Europe, cyclonic
1816	2	18	49	-3.54	-3.00	-0.77	0.84	cold	dry	clear	7	0.98	Westerly flow over Southern Europe, cyclonic
1816	2	19	50	-0.56	-1.18	-0.31	2.11	normal	slight snowfall	partly cloudy	1	0.61	Northeast, indifferent
1816	2	20	51	2.96	2.76	0.72	0	warm	dry	clear	3	0.66	Westerly flow over Northern Europe
1816	2	21	52	3.48	1.86	0.48	0	normal	dry	clear	5	0.99	High Pressure over Europe
1816	2	22	53	3.30	1.74	0.45	0.18	normal	dry	clear	5	1.00	High Pressure over Europe
1816	2	23	54	2.38	1.01	0.26	0	normal	dry	clear	5	1.00	High Pressure over Europe
1816	2	24	55	0.31	-1.72	-0.45	0	normal	dry	clear	5	1.00	High Pressure over Europe
1816	2	25	56	4.61	2.31	0.61	0	warm	dry	clear	5	1.00	High Pressure over Europe
1816	2	26	57	6.55	3.80	1.00	4.88	warm	slight rain	partly cloudy	3	0.97	Westerly flow over Northern Europe
1816	2	27	58	1.70	-1.51	-0.40	0.55	normal	dry	clear	1	0.90	Northeast, indifferent
1816	2	28	59	4.58	0.96	0.25	1.94	normal	slight rain	partly cloudy	7	1.00	Westerly flow over Southern Europe, cyclonic
1816	2	29	60	NA	NA	NA	NA	extremely warm	NA	NA	7	0.86	Westerly flow over Southern Europe, cyclonic
1816	3	1	61	0.34	-2.91	-0.78	1.98	cold	slight snowfall	partly cloudy	1	0.63	Northeast, indifferent
1816	3	2	62	0.58	-3.74	-1.00	5.54	cold	snowfall	partly cloudy	3	1.00	Westerly flow over Northern Europe
1816	3	3	63	6.24	3.76	1.01	0	warm	dry	clear	7	0.60	Westerly flow over Southern Europe, cyclonic
1816	3	4	64	5.91	2.82	0.76	2	warm	slight rain	partly cloudy	7	1.00	Westerly flow over Southern Europe, cyclonic
1816	3	5	65	4.72	1.61	0.44	10.97	normal	rain	partly cloudy	7	1.00	Westerly flow over Southern Europe, cyclonic
1816	3	6	66	11.23	8.83	2.40	3.64	very warm	slight rain	partly cloudy	7	1.00	Westerly flow over Southern Europe, cyclonic
1816	3	7	67	5.37	3.72	1.01	22.12	warm	heavy rain	cloudy	7	1.00	Westerly flow over Southern Europe, cyclonic
1816	3	8	68	2.65	1.17	0.32	6.12	normal	rain	partly cloudy	7	1.00	Westerly flow over Southern Europe, cyclonic
1816	3	9	69	2.11	-0.38	-0.10	0.34	normal	dry	partly cloudy	7	1.00	Westerly flow over Southern Europe, cyclonic
1816	3	10	70	-0.65	-3.26	-0.90	7	cold	snowfall	partly cloudy	7	0.95	Westerly flow over Southern Europe, cyclonic
1816	3	11	71	0.09	-2.36	-0.65	0.14	cold	dry	clear	1	0.79	Northeast, indifferent
1816	3	12	72	2.83	0.49	0.14	0	normal	dry	clear	4	0.56	East, indifferent
1816	3	13	73	6.76	2.64	0.73	0	warm	dry	clear	3	0.96	Westerly flow over Northern Europe
1816	3	14	74	6.90	3.55	0.99	0	warm	dry	clear	5	0.84	High Pressure over Europe
1816	3	15	75	6.71	2.53	0.71	0	warm	dry	clear	2	0.93	West-SouthWest, cyclonic, flat pressure distribution
1816	3	16	76	2.38	-2.57	-0.72	0	cold	dry	clear	2	0.53	West-SouthWest, cyclonic, flat pressure distribution
1816	3	17	77	0.91	-4.36	-1.23	0	cold	dry	partly cloudy	6	0.54	orth, cyclonic
1816	3	18	78	1.20	-4.17	-1.18	4.4	cold	slight snowfall	partly cloudy	7	0.75	Westerly flow over Southern Europe, cyclonic
1816	3	19	79	4.94	-1.32	-0.37	1.76	normal	slight rain	partly cloudy	6	0.73	orth, cyclonic
1816	3	20	80	3.33	-2.85	-0.81	0.58	cold	dry	clear	6	0.73	orth, cyclonic
1816	3	21	81	2.97	-2.87	-0.82	0	cold	dry	clear	1	0.65	Northeast, indifferent
1816	3	22	82	2.04	-3.28	-0.94	0	cold	dry	clear	1	0.96	Northeast, indifferent
1816	3	23	83	2.93	-2.50	-0.72	0.03	cold	dry	partly cloudy	1	0.85	Northeast, indifferent
1816	3	24	84	6.53	0.51	0.15	0	normal	dry	clear	4	0.96	East, indifferent
1816	3	25	85	4.28	-1.64	-0.47	0.04	normal	dry	clear	4	0.91	East, indifferent
1816	3	26	86	1.92	-4.57	-1.32	0	cold	dry	clear	4	0.66	East, indifferent
1816	3	27	87	2.72	-3.72	-1.08	0	cold	dry	clear	4	0.60	East, indifferent
1816	3	28	88	-1.60	-8.07	-2.34	7.92	very cold	snowfall	cloudy	1	0.98	Northeast, indifferent
1816	3	29	89	-1.79	-8.71	-2.54	0	extremely cold	dry	clear	1	0.97	Northeast, indifferent
1816	3	30	90	-0.68	-7.37	-2.15	0.13	very cold	dry	cloudy	1	0.71	Northeast, indifferent
1816	3	31	91	0.21	-7.07	-2.07	0.13	very cold	dry	cloudy	4	0.94	East, indifferent
1816	4	1	92	3.15	-4.29	-1.26	0	cold	dry	partly cloudy	1	0.97	Northeast, indifferent
1816	4	2	93	2.79	-7.01	-2.06	0	very cold	dry	partly cloudy	1	0.70	Northeast, indifferent
1816	4	3	94	2.67	-5.84	-1.72	1.21	very cold	slight rain	partly cloudy	1	0.59	Northeast, indifferent
1816	4	4	95	4.76	-4.06	-1.20	0	cold	dry	clear	1	0.90	Northeast, indifferent
1816	4	5	96	6.45	-2.41	-0.71	0	cold	dry	clear	1	0.84	Northeast, indifferent
1816	4	6	97	10.51	1.23	0.36	0.06	normal	dry	clear	7	0.92	Westerly flow over Southern Europe, cyclonic
1816	4	7	98	11.55	1.59	0.47	0	normal	dry	clear	7	1.00	Westerly flow over Southern Europe, cyclonic
1816	4	8	99	9.36	-0.60	-0.18	0	normal	dry	clear	7	1.00	Westerly flow over Southern Europe, cyclonic
1816	4	9	100	11.84	1.87	0.56	14.33	warm	rain	partly cloudy	7	1.00	Westerly flow over Southern Europe, cyclonic
1816	4	10	101	11.32	0.84	0.25	6.59	normal	rain	partly cloudy	7	1.00	Westerly flow over Southern Europe, cyclonic
1816	4	11	102	12.04	1.51	0.45	5.45	normal	rain	cloudy	7	0.98	Westerly flow over Southern Europe, cyclonic
1816	4	12	103	8.59	-1.19	-0.36	0	normal	dry	clear	6	0.71	orth, cyclonic
1816	4	13	104	9.08	-0.68	-0.20	1.07	normal	slight rain	partly cloudy	6	0.49	orth, cyclonic
1816	4	14	105	4.93	-4.57	-1.37	6.41	cold	rain	partly cloudy	7	1.00	Westerly flow over Southern Europe, cyclonic
1816	4	15	106	3.91	-6.75	-2.03	0	very cold	dry	clear	7	0.64	Westerly flow over Southern Europe, cyclonic
1816	4	16	107	6.37	-3.74	-1.13	6.56	cold	rain	cloudy	6	0.56	orth, cyclonic
1816	4	17	108	6.75	-2.98	-0.90	6.56	cold	rain	partly cloudy	7	0.62	Westerly flow over Southern Europe, cyclonic
1816	4	18	109	10.24	-0.38	-0.11	4.06	normal	slight rain	partly cloudy	7	0.77	Westerly flow over Southern Europe, cyclonic
1816	4	19	110	10.22	0.13	0.04	0.5	normal	dry	partly cloudy	2	0.61	West-SouthWest, cyclonic, flat pressure distribution
1816	4	20	111	8.88	-1.52	-0.46	5.7	normal	rain	cloudy	3	0.54	Westerly flow over Northern Europe
1816	4	21	112	10.84	-0.53	-0.16	0	normal	dry	partly cloudy	1	0.78	Northeast, indifferent
1816	4	22	113	13.24	3.41	1.03	3.91	warm	slight rain	partly cloudy	2	0.94	West-SouthWest, cyclonic, flat pressure distribution
1816	4	23	114	11.50	1.87	0.57	0	warm	dry	partly cloudy	6	0.74	orth, cyclonic
1816	4	24	115	8.02	-2.14	-0.65	0.82	cold	dry	partly cloudy	6	0.93	orth, cyclonic
1816	4	25	116	7.15	-4.11	-1.25	0.07	cold	dry	clear	6	0.85	orth, cyclonic
1816	4	26	117	9.09	-0.92	-0.28	0.02	normal	dry	clear	1	0.85	Northeast, indifferent
1816	4	27	118	9.76	0.08	0.02	0	normal	dry	clear	6	0.62	orth, cyclonic
1816	4	28	119	8.05	-2.01	-0.61	0	cold	dry	clear	6	0.82	orth, cyclonic
1816	4	29	120	8.15	-1.83	-0.56	9.01	cold	rain	partly cloudy	7	0.42	Westerly flow over Southern Europe, cyclonic
1816	4	30	121	11.17	0.40	0.12	0.04	normal	dry	clear	7	0.91	Westerly flow over Southern Europe, cyclonic
1816	5	1	122	9.22	-2.24	-0.68	0.41	cold	dry	partly cloudy	7	0.57	Westerly flow over Southern Europe, cyclonic
1816	5	2	123	13.00	-0.09	-0.03	0.12	normal	dry	clear	6	0.84	orth, cyclonic
1816	5	3	124	11.81	-2.47	-0.75	0	cold	dry	clear	1	1.00	Northeast, indifferent
1816	5	4	125	7.94	-5.45	-1.66	0.49	very cold	dry	partly cloudy	1	1.00	Northeast, indifferent
1816	5	5	126	12.12	-1.03	-0.31	0.04	normal	dry	clear	6	0.81	orth, cyclonic
1816	5	6	127	13.25	-1.00	-0.30	6.42	normal	rain	partly cloudy	6	0.34	orth, cyclonic
1816	5	7	128	11.57	-2.58	-0.78	3.46	cold	slight rain	cloudy	6	1.00	orth, cyclonic
1816	5	8	129	12.39	-3.44	-1.05	6.47	cold	rain	partly cloudy	7	0.74	Westerly flow over Southern Europe, cyclonic
1816	5	9	130	11.36	-3.84	-1.17	0	cold	dry	clear	7	1.00	Westerly flow over Southern Europe, cyclonic
1816	5	10	131	7.22	-6.49	-1.97	0.98	very cold	dry	partly cloudy	7	0.78	Westerly flow over Southern Europe, cyclonic
1816	5	11	132	9.36	-3.11	-0.95	16.72	cold	heavy rain	cloudy	7	1.00	Westerly flow over Southern Europe, cyclonic
1816	5	12	133	7.79	-6.04	-1.84	16.72	very cold	heavy rain	cloudy	7	1.00	Westerly flow over Southern Europe, cyclonic
1816	5	13	134	4.02	-9.68	-2.94	16.72	extremely cold	heavy rain	cloudy	7	0.57	Westerly flow over Southern Europe, cyclonic
1816	5	14	135	6.54	-6.79	-2.06	0.98	very cold	dry	partly cloudy	1	0.60	Northeast, indifferent
1816	5	15	136	9.22	-3.35	-1.02	1.31	cold	slight rain	partly cloudy	1	1.00	Northeast, indifferent
1816	5	16	137	9.69	-3.59	-1.09	0	cold	dry	clear	6	1.00	orth, cyclonic
1816	5	17	138	11.72	-1.39	-0.42	0	normal	dry	clear	6	0.91	orth, cyclonic
1816	5	18	139	14.19	1.39	0.42	0.06	normal	dry	clear	6	0.84	orth, cyclonic
1816	5	19	140	15.72	1.61	0.49	0.73	normal	dry	clear	6	0.76	orth, cyclonic
1816	5	20	141	17.96	3.42	1.04	3.52	warm	slight rain	partly cloudy	6	0.44	orth, cyclonic
1816	5	21	142	18.18	2.73	0.83	0	warm	dry	clear	6	0.82	orth, cyclonic
1816	5	22	143	17.72	2.53	0.76	1.63	warm	slight rain	partly cloudy	6	0.94	orth, cyclonic
1816	5	23	144	16.51	0.86	0.26	0.62	normal	dry	clear	6	0.99	orth, cyclonic
1816	5	24	145	16.41	0.79	0.24	0.02	normal	dry	clear	6	0.52	orth, cyclonic
1816	5	25	146	15.34	0.90	0.27	0.03	normal	dry	clear	1	0.60	Northeast, indifferent
1816	5	26	147	10.56	-3.69	-1.11	0	cold	dry	clear	1	0.99	Northeast, indifferent
1816	5	27	148	11.50	-2.84	-0.86	0	cold	dry	clear	1	0.90	Northeast, indifferent
1816	5	28	149	11.70	-2.59	-0.78	2.31	cold	slight rain	partly cloudy	1	0.70	Northeast, indifferent
1816	5	29	150	12.32	-2.48	-0.75	2.31	cold	slight rain	partly cloudy	6	0.60	orth, cyclonic
1816	5	30	151	13.15	-1.74	-0.53	3.46	cold	slight rain	cloudy	6	0.43	orth, cyclonic
1816	5	31	152	12.21	-2.04	-0.62	2.31	cold	slight rain	partly cloudy	6	0.57	orth, cyclonic
1816	6	1	153	13.21	-1.04	-0.31	0	normal	dry	partly cloudy	6	0.80	orth, cyclonic
1816	6	2	154	13.23	-1.54	-0.46	0	normal	dry	partly cloudy	1	0.99	Northeast, indifferent
1816	6	3	155	16.04	0.86	0.26	1.19	normal	slight rain	partly cloudy	6	0.22	orth, cyclonic
1816	6	4	156	15.69	-0.49	-0.15	0	normal	dry	clear	1	0.66	Northeast, indifferent
1816	6	5	157	13.78	-1.92	-0.58	0	cold	dry	partly cloudy	7	0.97	Westerly flow over Southern Europe, cyclonic
1816	6	6	158	13.16	-3.56	-1.07	3.8	cold	slight rain	partly cloudy	7	1.00	Westerly flow over Southern Europe, cyclonic
1816	6	7	159	11.13	-6.01	-1.81	3.8	very cold	slight rain	partly cloudy	6	1.00	orth, cyclonic
1816	6	8	160	11.13	-5.60	-1.69	3.8	very cold	slight rain	partly cloudy	7	1.00	Westerly flow over Southern Europe, cyclonic
1816	6	9	161	10.45	-5.76	-1.73	12.77	very cold	rain	cloudy	7	1.00	Westerly flow over Southern Europe, cyclonic
1816	6	10	162	10.90	-5.63	-1.70	12.77	very cold	rain	cloudy	7	1.00	Westerly flow over Southern Europe, cyclonic
1816	6	11	163	8.66	-7.52	-2.27	0.72	very cold	dry	clear	2	0.78	West-SouthWest, cyclonic, flat pressure distribution
1816	6	12	164	12.64	-3.99	-1.20	0	cold	dry	clear	6	0.27	orth, cyclonic
1816	6	13	165	15.93	-1.00	-0.30	0.7	normal	dry	clear	1	0.92	Northeast, indifferent
1816	6	14	166	17.16	0.55	0.16	4.7	normal	slight rain	partly cloudy	2	0.79	West-SouthWest, cyclonic, flat pressure distribution
1816	6	15	167	15.88	-0.29	-0.09	23.47	normal	heavy rain	partly cloudy	2	0.72	West-SouthWest, cyclonic, flat pressure distribution
1816	6	16	168	14.46	-1.13	-0.34	0.27	normal	dry	partly cloudy	6	0.62	orth, cyclonic
1816	6	17	169	9.84	-5.73	-1.73	9.69	very cold	rain	partly cloudy	6	0.61	orth, cyclonic
1816	6	18	170	11.17	-4.95	-1.50	5.43	cold	rain	cloudy	6	0.98	orth, cyclonic
1816	6	19	171	11.61	-4.02	-1.22	0	cold	dry	partly cloudy	6	0.63	orth, cyclonic
1816	6	20	172	14.21	-2.02	-0.61	0.02	cold	dry	clear	6	0.53	orth, cyclonic
1816	6	21	173	11.41	-3.02	-0.92	0	cold	dry	clear	6	0.24	orth, cyclonic
1816	6	22	174	11.86	-2.30	-0.70	5.09	cold	rain	partly cloudy	1	0.91	Northeast, indifferent
1816	6	23	175	14.30	-0.39	-0.12	3.94	normal	slight rain	partly cloudy	2	0.50	West-SouthWest, cyclonic, flat pressure distribution
1816	6	24	176	12.11	-3.17	-0.96	0	cold	dry	clear	6	0.93	orth, cyclonic
1816	6	25	177	12.38	-4.45	-1.35	0.79	cold	dry	cloudy	6	1.00	orth, cyclonic
1816	6	26	178	12.77	-5.07	-1.55	0.79	very cold	dry	cloudy	6	0.98	orth, cyclonic
1816	6	27	179	12.25	-5.35	-1.63	7.38	very cold	rain	partly cloudy	7	0.90	Westerly flow over Southern Europe, cyclonic
1816	6	28	180	11.53	-5.85	-1.79	20.55	very cold	heavy rain	partly cloudy	6	0.97	orth, cyclonic
1816	6	29	181	11.32	-6.17	-1.89	2.14	very cold	slight rain	partly cloudy	6	0.62	orth, cyclonic
1816	6	30	182	15.13	-2.51	-0.77	10.47	cold	rain	cloudy	6	0.70	orth, cyclonic
1816	7	1	183	16.40	-2.25	-0.69	9.69	cold	rain	partly cloudy	7	0.35	Westerly flow over Southern Europe, cyclonic
1816	7	2	184	11.75	-7.23	-2.23	0.72	very cold	dry	clear	6	0.95	orth, cyclonic
1816	7	3	185	12.65	-6.13	-1.89	0.18	very cold	dry	cloudy	6	0.99	orth, cyclonic
1816	7	4	186	14.34	-4.24	-1.31	0	cold	dry	clear	6	0.32	orth, cyclonic
1816	7	5	187	13.31	-4.52	-1.40	0.72	cold	dry	clear	2	0.69	West-SouthWest, cyclonic, flat pressure distribution
1816	7	6	188	13.89	-4.25	-1.32	10.72	cold	rain	cloudy	2	0.85	West-SouthWest, cyclonic, flat pressure distribution
1816	7	7	189	16.92	-0.50	-0.15	5.43	normal	rain	cloudy	7	0.29	Westerly flow over Southern Europe, cyclonic
1816	7	8	190	18.45	0.41	0.13	19.37	normal	heavy rain	partly cloudy	6	0.49	orth, cyclonic
1816	7	9	191	19.55	1.39	0.43	0	normal	dry	clear	7	0.29	Westerly flow over Southern Europe, cyclonic
1816	7	10	192	19.85	1.43	0.45	2.57	normal	slight rain	partly cloudy	7	0.90	Westerly flow over Southern Europe, cyclonic
1816	7	11	193	17.10	-1.70	-0.53	3.8	cold	slight rain	partly cloudy	6	0.82	orth, cyclonic
1816	7	12	194	15.82	-1.91	-0.60	3.8	cold	slight rain	partly cloudy	7	1.00	Westerly flow over Southern Europe, cyclonic
1816	7	13	195	15.10	-2.99	-0.94	9.46	cold	rain	partly cloudy	6	0.98	orth, cyclonic
1816	7	14	196	11.80	-5.41	-1.71	2.71	very cold	slight rain	partly cloudy	2	0.69	West-SouthWest, cyclonic, flat pressure distribution
1816	7	15	197	15.38	-2.52	-0.80	10.07	cold	rain	partly cloudy	7	0.43	Westerly flow over Southern Europe, cyclonic
1816	7	16	198	12.14	-4.94	-1.57	9.69	very cold	rain	partly cloudy	7	0.39	Westerly flow over Southern Europe, cyclonic
1816	7	17	199	10.09	-6.62	-2.11	3.8	very cold	slight rain	partly cloudy	7	0.91	Westerly flow over Southern Europe, cyclonic
1816	7	18	200	15.18	-1.44	-0.46	5.89	normal	rain	partly cloudy	7	0.76	Westerly flow over Southern Europe, cyclonic
1816	7	19	201	16.92	-0.60	-0.19	7.32	normal	rain	partly cloudy	2	0.99	West-SouthWest, cyclonic, flat pressure distribution
1816	7	20	202	16.25	-1.18	-0.38	11.59	normal	rain	partly cloudy	2	0.97	West-SouthWest, cyclonic, flat pressure distribution
1816	7	21	203	20.49	2.69	0.87	0.91	warm	dry	clear	7	0.25	Westerly flow over Southern Europe, cyclonic
1816	7	22	204	17.28	-0.35	-0.11	0	normal	dry	clear	6	0.64	orth, cyclonic
1816	7	23	205	15.57	-2.07	-0.67	0	cold	dry	clear	7	0.52	Westerly flow over Southern Europe, cyclonic
1816	7	24	206	16.35	-0.98	-0.32	7.06	normal	rain	cloudy	7	0.55	Westerly flow over Southern Europe, cyclonic
1816	7	25	207	13.19	-4.66	-1.53	9.19	very cold	rain	partly cloudy	7	0.18	Westerly flow over Southern Europe, cyclonic
1816	7	26	208	12.82	-4.81	-1.58	9.46	very cold	rain	partly cloudy	6	0.51	orth, cyclonic
1816	7	27	209	14.31	-4.77	-1.57	10.19	very cold	rain	partly cloudy	1	0.69	Northeast, indifferent
1816	7	28	210	17.91	-0.97	-0.32	7.32	normal	rain	partly cloudy	2	0.91	West-SouthWest, cyclonic, flat pressure distribution
1816	7	29	211	18.68	-0.17	-0.06	2.01	normal	slight rain	partly cloudy	7	1.00	Westerly flow over Southern Europe, cyclonic
1816	7	30	212	12.41	-6.67	-2.23	38.48	very cold	heavy rain	cloudy	7	1.00	Westerly flow over Southern Europe, cyclonic
1816	7	31	213	15.40	-4.75	-1.59	12.13	very cold	rain	partly cloudy	7	1.00	Westerly flow over Southern Europe, cyclonic
1816	8	1	214	16.45	-3.83	-1.29	8.17	cold	rain	cloudy	7	0.93	Westerly flow over Southern Europe, cyclonic
1816	8	2	215	14.79	-4.56	-1.54	9.46	very cold	rain	partly cloudy	2	0.87	West-SouthWest, cyclonic, flat pressure distribution
1816	8	3	216	19.12	-0.10	-0.03	54.88	normal	heavy rain	cloudy	2	0.65	West-SouthWest, cyclonic, flat pressure distribution
1816	8	4	217	19.11	-0.48	-0.16	0	normal	dry	clear	2	0.98	West-SouthWest, cyclonic, flat pressure distribution
1816	8	5	218	19.45	0.70	0.24	0	normal	dry	clear	2	0.92	West-SouthWest, cyclonic, flat pressure distribution
1816	8	6	219	17.78	-1.60	-0.55	9.06	cold	rain	partly cloudy	1	0.99	Northeast, indifferent
1816	8	7	220	16.76	-2.98	-1.03	0.84	cold	dry	clear	1	0.78	Northeast, indifferent
1816	8	8	221	18.89	-0.26	-0.09	6.65	normal	rain	partly cloudy	2	0.92	West-SouthWest, cyclonic, flat pressure distribution
1816	8	9	222	22.27	2.98	1.04	0.91	warm	dry	clear	2	0.82	West-SouthWest, cyclonic, flat pressure distribution
1816	8	10	223	18.33	-0.74	-0.26	9.06	normal	rain	partly cloudy	6	0.69	orth, cyclonic
1816	8	11	224	16.30	-2.67	-0.94	0	cold	dry	clear	4	0.97	East, indifferent
1816	8	12	225	17.88	-1.42	-0.50	0	normal	dry	clear	4	0.83	East, indifferent
1816	8	13	226	20.42	2.08	0.74	0	warm	dry	clear	1	0.73	Northeast, indifferent
1816	8	14	227	21.82	3.15	1.12	9.33	warm	rain	partly cloudy	2	0.94	West-SouthWest, cyclonic, flat pressure distribution
1816	8	15	228	22.03	3.71	1.32	0	warm	dry	clear	7	0.76	Westerly flow over Southern Europe, cyclonic
1816	8	16	229	14.92	-3.60	-1.29	34.81	cold	heavy rain	cloudy	7	0.60	Westerly flow over Southern Europe, cyclonic
1816	8	17	230	14.72	-4.06	-1.46	10.63	cold	rain	cloudy	6	0.51	orth, cyclonic
1816	8	18	231	11.20	-7.07	-2.55	1.27	extremely cold	slight rain	partly cloudy	6	0.99	orth, cyclonic
1816	8	19	232	10.72	-8.11	-2.94	1.74	extremely cold	slight rain	partly cloudy	1	0.93	Northeast, indifferent
1816	8	20	233	11.71	-6.90	-2.51	0	extremely cold	dry	clear	1	0.72	Northeast, indifferent
1816	8	21	234	12.51	-5.28	-1.93	19.95	very cold	heavy rain	partly cloudy	1	0.95	Northeast, indifferent
1816	8	22	235	11.28	-5.97	-2.18	0	very cold	dry	partly cloudy	1	0.99	Northeast, indifferent
1816	8	23	236	13.70	-3.50	-1.29	0	cold	dry	clear	1	0.99	Northeast, indifferent
1816	8	24	237	11.01	-7.04	-2.59	0.07	extremely cold	dry	partly cloudy	1	0.97	Northeast, indifferent
1816	8	25	238	12.19	-6.55	-2.42	0.07	very cold	dry	partly cloudy	1	0.99	Northeast, indifferent
1816	8	26	239	10.19	-8.07	-3.00	0	extremely cold	dry	partly cloudy	1	0.99	Northeast, indifferent
1816	8	27	240	11.24	-6.63	-2.47	19.95	very cold	heavy rain	partly cloudy	1	0.98	Northeast, indifferent
1816	8	28	241	14.17	-3.23	-1.21	1.52	cold	slight rain	partly cloudy	3	0.55	Westerly flow over Northern Europe
1816	8	29	242	16.86	-1.18	-0.44	0	normal	dry	partly cloudy	4	0.62	East, indifferent
1816	8	30	243	16.67	-1.55	-0.58	8.73	cold	rain	partly cloudy	2	0.88	West-SouthWest, cyclonic, flat pressure distribution
1816	8	31	244	15.38	-2.89	-1.09	1.03	cold	slight rain	partly cloudy	7	1.00	Westerly flow over Southern Europe, cyclonic
1816	9	1	245	14.04	-3.32	-1.25	12.13	cold	rain	cloudy	7	1.00	Westerly flow over Southern Europe, cyclonic
1816	9	2	246	13.37	-3.67	-1.39	27.03	cold	heavy rain	cloudy	7	1.00	Westerly flow over Southern Europe, cyclonic
1816	9	3	247	9.44	-8.14	-3.10	6.7	extremely cold	rain	cloudy	1	0.97	Northeast, indifferent
1816	9	4	248	12.30	-4.71	-1.80	27.03	very cold	heavy rain	cloudy	2	0.53	West-SouthWest, cyclonic, flat pressure distribution
1816	9	5	249	12.62	-4.78	-1.83	1.27	very cold	slight rain	partly cloudy	1	0.95	Northeast, indifferent
1816	9	6	250	15.42	-1.70	-0.65	3.38	cold	slight rain	partly cloudy	1	0.96	Northeast, indifferent
1816	9	7	251	15.32	-1.46	-0.56	0	cold	dry	clear	1	0.92	Northeast, indifferent
1816	9	8	252	15.19	-1.05	-0.40	0	normal	dry	clear	1	0.53	Northeast, indifferent
1816	9	9	253	15.66	0.00	0.00	0.07	normal	dry	clear	2	0.55	West-SouthWest, cyclonic, flat pressure distribution
1816	9	10	254	18.18	2.51	0.97	0	warm	dry	clear	3	0.82	Westerly flow over Northern Europe
1816	9	11	255	17.78	2.40	0.93	0	warm	dry	clear	3	0.94	Westerly flow over Northern Europe
1816	9	12	256	17.28	2.08	0.80	0	warm	dry	clear	1	0.49	Northeast, indifferent
1816	9	13	257	13.16	-0.89	-0.34	0	normal	dry	clear	4	0.91	East, indifferent
1816	9	14	258	12.13	-1.79	-0.69	0.01	cold	dry	clear	4	0.87	East, indifferent
1816	9	15	259	13.97	-1.53	-0.59	0.12	cold	dry	partly cloudy	3	0.99	Westerly flow over Northern Europe
1816	9	16	260	18.21	2.15	0.84	0.05	warm	dry	clear	3	0.98	Westerly flow over Northern Europe
1816	9	17	261	18.83	2.66	1.03	0	warm	dry	clear	3	0.86	Westerly flow over Northern Europe
1816	9	18	262	20.31	4.75	1.85	0.03	very warm	dry	partly cloudy	3	0.96	Westerly flow over Northern Europe
1816	9	19	263	17.51	1.76	0.68	1.29	warm	slight rain	partly cloudy	2	0.41	West-SouthWest, cyclonic, flat pressure distribution
1816	9	20	264	13.32	-2.31	-0.90	0	cold	dry	clear	1	0.99	Northeast, indifferent
1816	9	21	265	14.98	0.09	0.03	0.1	normal	dry	clear	2	0.97	West-SouthWest, cyclonic, flat pressure distribution
1816	9	22	266	14.89	0.75	0.29	17.56	normal	heavy rain	partly cloudy	2	0.97	West-SouthWest, cyclonic, flat pressure distribution
1816	9	23	267	14.89	0.86	0.33	0	normal	dry	clear	1	0.62	Northeast, indifferent
1816	9	24	268	14.96	1.16	0.45	17	normal	heavy rain	cloudy	2	0.66	West-SouthWest, cyclonic, flat pressure distribution
1816	9	25	269	13.42	-0.47	-0.18	8.11	normal	rain	partly cloudy	1	0.96	Northeast, indifferent
1816	9	26	270	13.10	-0.21	-0.08	0	normal	dry	clear	4	0.79	East, indifferent
1816	9	27	271	13.07	-0.67	-0.26	0.46	normal	dry	partly cloudy	4	0.52	East, indifferent
1816	9	28	272	11.68	-2.37	-0.92	0	cold	dry	clear	4	0.73	East, indifferent
1816	9	29	273	12.46	-1.16	-0.44	0.04	normal	dry	partly cloudy	3	1.00	Westerly flow over Northern Europe
1816	9	30	274	14.95	1.09	0.42	0.01	normal	dry	clear	7	1.00	Westerly flow over Southern Europe, cyclonic
1816	10	1	275	12.81	-0.98	-0.38	0.52	normal	dry	clear	7	0.56	Westerly flow over Southern Europe, cyclonic
1816	10	2	276	12.04	-0.21	-0.08	0.32	normal	dry	clear	2	0.92	West-SouthWest, cyclonic, flat pressure distribution
1816	10	3	277	12.05	0.32	0.12	0.06	normal	dry	clear	6	0.37	orth, cyclonic
1816	10	4	278	12.94	0.99	0.38	2.77	normal	slight rain	partly cloudy	3	0.97	Westerly flow over Northern Europe
1816	10	5	279	12.21	0.17	0.06	0	normal	dry	clear	5	0.85	High Pressure over Europe
1816	10	6	280	11.72	-0.15	-0.06	2.63	normal	slight rain	cloudy	5	0.69	High Pressure over Europe
1816	10	7	281	14.99	2.46	0.93	0.1	warm	dry	cloudy	1	0.36	Northeast, indifferent
1816	10	8	282	17.46	4.70	1.76	13.5	very warm	rain	cloudy	3	0.46	Westerly flow over Northern Europe
1816	10	9	283	14.19	1.97	0.74	0.09	warm	dry	clear	4	0.56	East, indifferent
1816	10	10	284	12.11	0.75	0.28	0.04	normal	dry	clear	5	0.59	High Pressure over Europe
1816	10	11	285	10.72	0.60	0.22	0	normal	dry	clear	1	0.82	Northeast, indifferent
1816	10	12	286	9.25	-0.70	-0.26	0.43	normal	dry	cloudy	1	0.58	Northeast, indifferent
1816	10	13	287	10.72	1.32	0.49	1.72	normal	slight rain	cloudy	5	0.66	High Pressure over Europe
1816	10	14	288	7.63	-0.55	-0.20	0	normal	dry	clear	5	0.96	High Pressure over Europe
1816	10	15	289	8.66	-0.72	-0.26	1.72	normal	slight rain	cloudy	4	0.89	East, indifferent
1816	10	16	290	6.50	-3.00	-1.09	0	cold	dry	partly cloudy	4	0.68	East, indifferent
1816	10	17	291	9.36	-0.01	0.00	0	normal	dry	partly cloudy	1	0.64	Northeast, indifferent
1816	10	18	292	8.90	-0.18	-0.06	6.16	normal	rain	partly cloudy	6	0.51	orth, cyclonic
1816	10	19	293	6.57	-1.75	-0.63	0	cold	dry	clear	1	0.80	Northeast, indifferent
1816	10	20	294	3.43	-3.78	-1.35	13.71	cold	rain	cloudy	6	0.38	orth, cyclonic
1816	10	21	295	0.68	-7.41	-2.62	0.95	extremely cold	dry	clear	7	1.00	Westerly flow over Southern Europe, cyclonic
1816	10	22	296	2.21	-7.58	-2.67	34.76	extremely cold	heavy rain	cloudy	6	1.00	orth, cyclonic
1816	10	23	297	4.17	-4.02	-1.41	4.67	cold	slight rain	partly cloudy	6	0.98	orth, cyclonic
1816	10	24	298	5.92	-2.78	-0.97	0.06	cold	dry	partly cloudy	1	0.62	Northeast, indifferent
1816	10	25	299	6.82	-1.38	-0.48	0	normal	dry	partly cloudy	2	0.81	West-SouthWest, cyclonic, flat pressure distribution
1816	10	26	300	6.80	-0.16	-0.05	0.14	normal	dry	partly cloudy	3	0.56	Westerly flow over Northern Europe
1816	10	27	301	5.31	-2.31	-0.79	0.03	cold	dry	partly cloudy	2	0.91	West-SouthWest, cyclonic, flat pressure distribution
1816	10	28	302	5.46	-2.15	-0.73	0	cold	dry	clear	2	0.84	West-SouthWest, cyclonic, flat pressure distribution
1816	10	29	303	4.38	-2.21	-0.75	5.68	cold	rain	partly cloudy	2	0.72	West-SouthWest, cyclonic, flat pressure distribution
1816	10	30	304	6.56	0.51	0.17	27.64	normal	heavy rain	partly cloudy	7	1.00	Westerly flow over Southern Europe, cyclonic
1816	10	31	305	4.62	-1.32	-0.44	27.67	normal	heavy rain	partly cloudy	7	1.00	Westerly flow over Southern Europe, cyclonic
1816	11	1	306	8.70	2.47	0.82	9.22	warm	rain	partly cloudy	7	0.85	Westerly flow over Southern Europe, cyclonic
1816	11	2	307	6.54	-0.23	-0.08	2.5	normal	slight rain	partly cloudy	6	0.52	orth, cyclonic
1816	11	3	308	4.80	-1.79	-0.59	0.03	cold	dry	partly cloudy	2	0.64	West-SouthWest, cyclonic, flat pressure distribution
1816	11	4	309	4.58	-1.44	-0.47	0	normal	dry	cloudy	2	0.89	West-SouthWest, cyclonic, flat pressure distribution
1816	11	5	310	7.07	0.95	0.31	1.64	normal	slight rain	partly cloudy	1	0.74	Northeast, indifferent
1816	11	6	311	12.57	6.52	2.10	0	very warm	dry	clear	7	0.60	Westerly flow over Southern Europe, cyclonic
1816	11	7	312	5.83	-0.89	-0.29	2.19	normal	slight rain	partly cloudy	7	1.00	Westerly flow over Southern Europe, cyclonic
1816	11	8	313	7.73	1.04	0.33	7.78	normal	rain	cloudy	7	1.00	Westerly flow over Southern Europe, cyclonic
1816	11	9	314	3.25	-2.84	-0.89	0.88	cold	dry	cloudy	7	0.90	Westerly flow over Southern Europe, cyclonic
1816	11	10	315	4.51	-1.58	-0.49	17.44	normal	heavy rain	cloudy	7	1.00	Westerly flow over Southern Europe, cyclonic
1816	11	11	316	-0.08	-5.17	-1.61	4.67	very cold	slight snowfall	partly cloudy	6	0.55	orth, cyclonic
1816	11	12	317	2.75	-2.63	-0.81	0.95	cold	dry	clear	7	0.95	Westerly flow over Southern Europe, cyclonic
1816	11	13	318	4.34	-1.19	-0.36	2.85	normal	slight rain	partly cloudy	2	0.89	West-SouthWest, cyclonic, flat pressure distribution
1816	11	14	319	10.00	4.01	1.23	5.66	warm	rain	cloudy	2	1.00	West-SouthWest, cyclonic, flat pressure distribution
1816	11	15	320	5.75	-0.79	-0.24	0.19	normal	dry	clear	7	1.00	Westerly flow over Southern Europe, cyclonic
1816	11	16	321	-0.03	-6.63	-2.00	4.67	very cold	slight snowfall	partly cloudy	7	1.00	Westerly flow over Southern Europe, cyclonic
1816	11	17	322	0.91	-6.27	-1.88	0.24	very cold	dry	clear	1	0.55	Northeast, indifferent
1816	11	18	323	-0.69	-6.95	-2.07	8.71	very cold	snowfall	cloudy	3	0.35	Westerly flow over Northern Europe
1816	11	19	324	4.01	-1.93	-0.57	0.06	cold	dry	partly cloudy	5	0.71	High Pressure over Europe
1816	11	20	325	5.20	-1.62	-0.48	0	normal	dry	clear	5	1.00	High Pressure over Europe
1816	11	21	326	-0.76	-6.03	-1.76	0.06	very cold	dry	cloudy	5	1.00	High Pressure over Europe
1816	11	22	327	0.05	-5.16	-1.50	0.06	very cold	dry	cloudy	5	0.99	High Pressure over Europe
1816	11	23	328	1.71	-3.35	-0.97	0.07	cold	dry	clear	2	0.70	West-SouthWest, cyclonic, flat pressure distribution
1816	11	24	329	3.83	-2.22	-0.64	0	cold	dry	clear	1	1.00	Northeast, indifferent
1816	11	25	330	5.45	0.97	0.28	3.47	normal	slight rain	partly cloudy	1	0.94	Northeast, indifferent
1816	11	26	331	0.13	-4.00	-1.13	3.47	cold	slight snowfall	partly cloudy	1	0.25	Northeast, indifferent
1816	11	27	332	3.79	-0.36	-0.10	0.07	normal	dry	partly cloudy	4	0.93	East, indifferent
1816	11	28	333	2.43	-1.44	-0.41	0	normal	dry	partly cloudy	7	1.00	Westerly flow over Southern Europe, cyclonic
1816	11	29	334	3.64	-0.14	-0.04	0.13	normal	dry	clear	7	0.97	Westerly flow over Southern Europe, cyclonic
1816	11	30	335	0.36	-3.40	-0.94	1.46	cold	slight snowfall	partly cloudy	5	0.66	High Pressure over Europe
1816	12	1	336	-2.31	-5.62	-1.55	0	very cold	dry	clear	4	0.99	East, indifferent
1816	12	2	337	-5.11	-7.13	-1.96	0	very cold	dry	clear	5	1.00	High Pressure over Europe
1816	12	3	338	-3.43	-3.98	-1.09	0	cold	dry	clear	5	1.00	High Pressure over Europe
1816	12	4	339	-3.42	-4.21	-1.14	0	cold	dry	partly cloudy	4	0.78	East, indifferent
1816	12	5	340	-1.20	-3.21	-0.87	1.46	cold	slight snowfall	partly cloudy	5	0.87	High Pressure over Europe
1816	12	6	341	0.33	-2.03	-0.55	0	cold	dry	clear	6	0.98	orth, cyclonic
1816	12	7	342	-0.26	-3.11	-0.83	4.64	cold	slight snowfall	partly cloudy	6	0.97	orth, cyclonic
1816	12	8	343	0.93	-1.40	-0.37	1.49	normal	slight snowfall	partly cloudy	1	0.41	Northeast, indifferent
1816	12	9	344	0.78	-2.44	-0.65	0	cold	dry	clear	3	0.75	Westerly flow over Northern Europe
1816	12	10	345	-1.24	-4.25	-1.12	1.52	cold	slight snowfall	partly cloudy	2	0.49	West-SouthWest, cyclonic, flat pressure distribution
1816	12	11	346	6.61	3.11	0.82	5.15	warm	rain	cloudy	2	0.51	West-SouthWest, cyclonic, flat pressure distribution
1816	12	12	347	3.96	1.84	0.48	18.75	normal	heavy rain	partly cloudy	7	0.95	Westerly flow over Southern Europe, cyclonic
1816	12	13	348	9.81	8.86	2.31	3.47	very warm	slight rain	cloudy	7	1.00	Westerly flow over Southern Europe, cyclonic
1816	12	14	349	6.29	3.99	1.04	6.89	warm	rain	cloudy	7	1.00	Westerly flow over Southern Europe, cyclonic
1816	12	15	350	4.27	3.08	0.80	0.04	warm	dry	clear	7	0.97	Westerly flow over Southern Europe, cyclonic
1816	12	16	351	5.44	4.91	1.27	9	warm	rain	partly cloudy	7	0.97	Westerly flow over Southern Europe, cyclonic
1816	12	17	352	4.53	4.64	1.19	0.11	warm	dry	partly cloudy	7	0.98	Westerly flow over Southern Europe, cyclonic
1816	12	18	353	8.00	7.49	1.92	9.22	very warm	rain	cloudy	7	1.00	Westerly flow over Southern Europe, cyclonic
1816	12	19	354	2.74	2.96	0.76	2.93	warm	slight rain	partly cloudy	6	0.80	orth, cyclonic
1816	12	20	355	-3.23	-3.87	-0.98	0.04	cold	dry	cloudy	4	0.98	East, indifferent
1816	12	21	356	-4.21	-5.93	-1.50	0.21	very cold	dry	clear	4	0.42	East, indifferent
1816	12	22	357	-1.39	-3.53	-0.89	0.81	cold	dry	cloudy	4	0.42	East, indifferent
1816	12	23	358	-0.92	-3.65	-0.92	2.5	cold	slight snowfall	cloudy	4	0.53	East, indifferent
1816	12	24	359	3.67	1.06	0.27	0	normal	dry	partly cloudy	3	0.98	Westerly flow over Northern Europe
1816	12	25	360	0.98	-0.48	-0.12	0.01	normal	dry	partly cloudy	3	0.60	Westerly flow over Northern Europe
1816	12	26	361	-0.46	-1.08	-0.27	0	normal	dry	clear	3	0.91	Westerly flow over Northern Europe
1816	12	27	362	3.27	2.40	0.60	4.5	warm	slight rain	partly cloudy	3	0.75	Westerly flow over Northern Europe
1816	12	28	363	1.29	-0.03	-0.01	3.42	normal	slight snowfall	partly cloudy	3	0.59	Westerly flow over Northern Europe
1816	12	29	364	4.45	3.34	0.83	0.35	warm	dry	partly cloudy	3	0.95	Westerly flow over Northern Europe
1816	12	30	365	4.00	3.24	0.80	0	warm	dry	clear	3	0.52	Westerly flow over Northern Europe
1816	12	31	366	1.43	2.01	0.50	0	normal	dry	partly cloudy	3	0.47	Westerly flow over Northern Europe
