# Supplementary material for: Synthetic weather diaries: concept and application to Swiss weather in 1816
Source: Copernicus journal article supplement (doi:10.5194/cp-16-1937-2020), 2020-10-21
Supplement: Supplementary file 1 [file cp-16-1937-2020-supplement.zip › Broennimann_Supplementary_Figure.pdf]

# Synthetic Weather Diaries: Concept and Application to Swiss Weather in 1816

## Supplementary Figure

Stefan Brönnimann<sup>1,2</sup>

<sup>1</sup> Institute of Geography, University of Bern, 3012 Bern, Switzerland

<sup>2</sup> Oeschger Centre for Climate Change Research, University of Bern, 3012 Bern, Switzerland

Correspondence to: S. Brönnimann ([stefan.broenniman@giub.unibe.ch](mailto:stefan.broenniman@giub.unibe.ch))

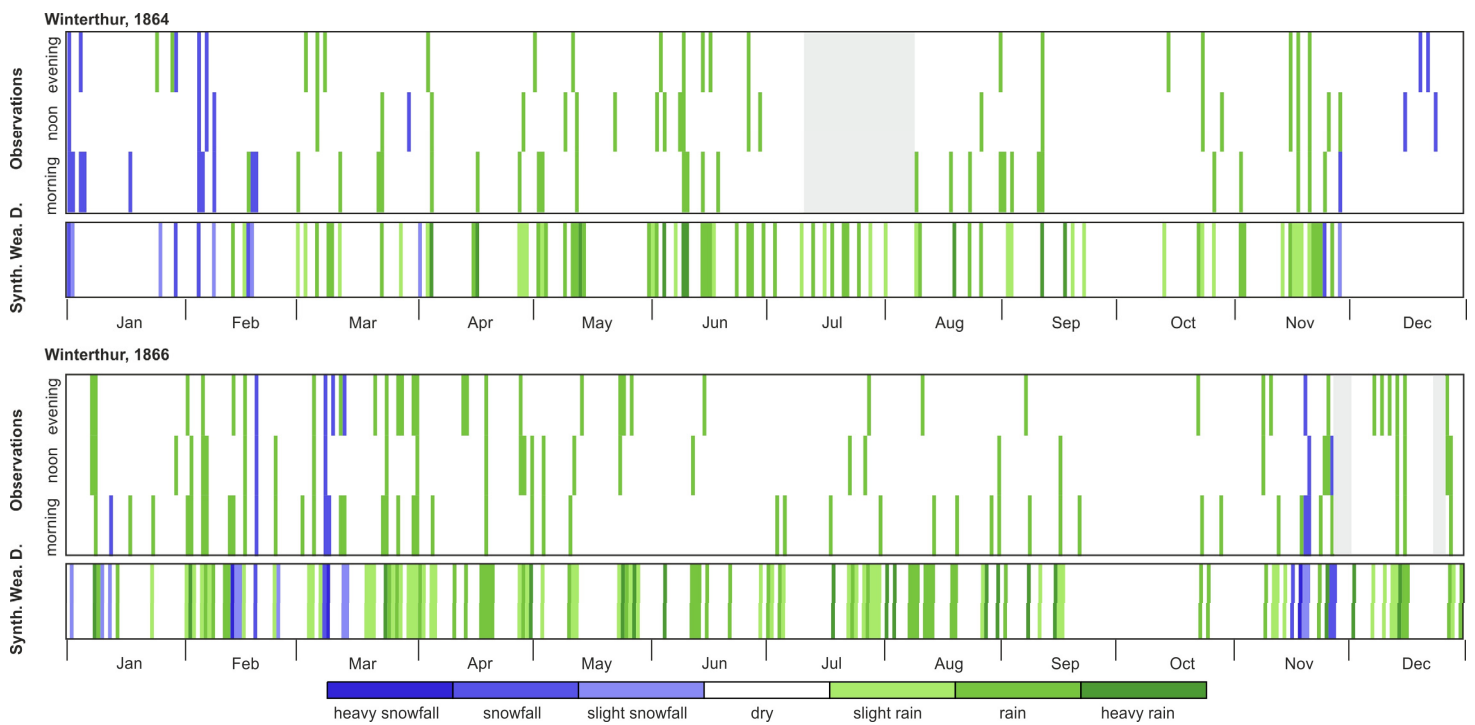

Figure S1: Comparison of observations (3 times daily) and synthetic weather diaries (daily) for precipitation in Winterthur (1864 and 1866) Grey shading in the top panel indicates an observation gap.
