# Supplementary material for: Synthetic weather diaries: concept and application to Swiss weather in 1816
Source: Copernicus journal article supplement (doi:10.5194/cp-16-1937-2020), 2020-10-21
Supplement: Supplementary file 1 [file cp-16-1937-2020-supplement.zip › cp-16-1937-2020-supplement-title-page.pdf]

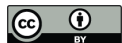

## *Supplement of*

# **Synthetic weather diaries: concept and application to Swiss weather in 1816**

**Stefan Brönnimann**

*Correspondence to:* Stefan Brönnimann ([stefan.broenniman@giub.unibe.ch](mailto:stefan.broenniman@giub.unibe.ch))

- [cp-16-1937-2020-supplement-title-page.pdf](#)
- [Aarau\\_1816\\_Daily\\_SyntheticWeatherDiary.csv](#)
- [Broennimann\\_Supplementary\\_Figure.pdf](#)
- [Geneva\\_1816\\_Monthly\\_SyntheticWeatherDiary.csv](#)
- [StGall\\_1816\\_Daily\\_SyntheticWeatherDiary.csv](#)

The copyright of individual parts of the supplement might differ from the CC BY 4.0 License.
