# Supplementary material for: Synthetic weather diaries: concept and application to Swiss weather in 1816
Source: Copernicus journal article supplement (doi:10.5194/cp-16-1937-2020), 2020-10-21
Supplement: Supplementary file 1 [file cp-16-1937-2020-supplement.zip › Geneva_1816_Monthly_SyntheticWeatherDiary.csv]

Year	Month	T[°C]	dT[°C]	T[sd]	T[text]	frostdays	maxFDD[°C]	maxFDD[text]	GDD[°C]	GDD[sd]	GDD[text]	GDD[d]	R[mm/d]	R[%]	raindays	snowfall days	P-E[mm]	P-E[text]	WT1(n)	WT2(n)	WT3(n)	WT4(n)	WT5(n)	WT6(n)	WT7(n)	WT1(%)	WT2(%)	WT3(%)	WT4(%)	WT5(%)	WT6(%)	WT7(%)
1816	1	0.48	0.60	0.34	average temperature	11	14	lakes not frozen	0	-0.89	NA	NA	1.97	93	6	6	60	normal moisture	3	4	2	4	2	1	15	158	153	59	119	16	30	365
1816	2	0.48	-1.03	-0.48	average temperature	9	28	lakes not frozen	5	-0.84	NA	NA	1.80	89	4	4	49	normal moisture	4	1	3	0	9	0	12	149	37	78	0	89	0	237
1816	3	3.67	-1.11	-0.70	cold	3	1	lakes not frozen	35	-1.32	late	-5	1.17	56	7	3	21	normal moisture	8	2	2	6	1	3	9	252	51	50	113	16	101	169
1816	4	7.86	-1.66	-1.23	cold	0	1	lakes not frozen	158	-1.65	very late	-21	1.77	72	9	0	13	normal moisture	7	2	1	0	0	8	12	107	41	36	0	0	142	202
1816	5	12.29	-1.71	-1.02	cold	0	0	NA	415	-1.52	very late	-15	2.61	104	12	0	6	normal moisture	8	0	0	0	0	16	7	111	0	0	0	0	337	223
1816	6	12.73	-3.32	-2.04	very cold	0	0	NA	676	-2.07	very late	-17	5.51	192	15	0	86	very wet	4	4	0	0	0	16	6	47	84	0	0	0	301	285
1816	7	15.10	-3.20	-2.23	very cold	0	0	NA	1020	-2.81	extremely late	-22	6.23	254	19	0	96	extremely wet	1	6	0	0	0	8	16	9	118	0	0	0	162	1358
1816	8	16.46	-2.44	-1.78	very cold	0	0	NA	1407	-2.82	NA	NA	3.19	119	12	0	1	wet	12	8	1	3	0	3	4	109	147	26	71	0	59	329
1816	9	15.04	-0.33	-0.24	average temperature	0	0	NA	1738	-2.73	NA	NA	2.35	78	7	0	-5	normal moisture	9	6	7	5	0	0	3	152	101	126	107	0	0	111
1816	10	9.23	-0.74	-0.59	cold	0	0	lakes not frozen	1901	-3.09	NA	NA	2.59	83	8	0	41	normal moisture	6	5	3	3	5	5	4	230	107	55	67	69	269	84
1816	11	4.62	-1.41	-1.01	cold	0	0	lakes not frozen	1941	-3.05	NA	NA	2.56	100	13	1	62	normal moisture	5	5	1	1	5	2	11	179	139	22	27	68	74	207
1816	12	1.48	-0.19	-0.16	average temperature	14	14	lakes not frozen	1956	-3.00	NA	NA	0.93	37	5	1	25	very dry	1	2	9	6	3	3	7	54	78	260	187	26	105	129
