# Supplementary material for: Synthetic weather diaries: concept and application to Swiss weather in 1816
Source: Copernicus journal article supplement (doi:10.5194/cp-16-1937-2020), 2020-10-21
Supplement: Supplementary file 1 [file cp-16-1937-2020-supplement.zip › StGall_1816_Daily_SyntheticWeatherDiary.csv]

YR	M	D	JD	T[degC]	dT[degC]	T[sd]	RR[mm/d]	T[text]	RR[text]	SKY[text]	WT	WT[p]	WT[text]
1816	1	1	1	-3.42	-2.47	-0.49	0	normal	dry	partly cloudy	5	1.00	High Pressure over Europe
1816	1	2	2	-5.88	-4.70	-0.93	0	cold	dry	cloudy	4	0.92	East, indifferent
1816	1	3	3	-5.35	-4.39	-0.87	0	cold	dry	clear	1	0.54	Northeast, indifferent
1816	1	4	4	-4.24	-2.63	-0.52	4.16	cold	slight snowfall	cloudy	4	0.95	East, indifferent
1816	1	5	5	-1.39	0.58	0.11	0	normal	dry	clear	4	0.49	East, indifferent
1816	1	6	6	-1.68	-0.93	-0.18	0	normal	dry	clear	3	0.98	Westerly flow over Northern Europe
1816	1	7	7	-0.78	0.58	0.11	0.17	normal	dry	clear	7	0.99	Westerly flow over Southern Europe, cyclonic
1816	1	8	8	-4.19	-1.92	-0.38	1.6	normal	slight snowfall	partly cloudy	2	1.00	West-SouthWest, cyclonic, flat pressure distribution
1816	1	9	9	2.25	5.05	0.99	0.62	warm	dry	partly cloudy	7	0.99	Westerly flow over Southern Europe, cyclonic
1816	1	10	10	0.57	3.83	0.75	3.82	warm	slight snowfall	cloudy	7	0.83	Westerly flow over Southern Europe, cyclonic
1816	1	11	11	-1.02	3.06	0.60	3.76	warm	slight snowfall	partly cloudy	7	1.00	Westerly flow over Southern Europe, cyclonic
1816	1	12	12	-2.80	0.60	0.12	0.79	normal	dry	clear	7	1.00	Westerly flow over Southern Europe, cyclonic
1816	1	13	13	0.12	3.67	0.72	2.36	warm	slight snowfall	partly cloudy	7	1.00	Westerly flow over Southern Europe, cyclonic
1816	1	14	14	-0.13	3.52	0.69	1.18	warm	slight snowfall	partly cloudy	7	1.00	Westerly flow over Southern Europe, cyclonic
1816	1	15	15	2.54	4.54	0.89	2.2	warm	slight rain	partly cloudy	7	1.00	Westerly flow over Southern Europe, cyclonic
1816	1	16	16	1.61	3.71	0.73	6.59	warm	snowfall	cloudy	1	0.46	Northeast, indifferent
1816	1	17	17	-1.13	0.16	0.03	0.02	normal	dry	clear	3	0.89	Westerly flow over Northern Europe
1816	1	18	18	-0.76	-1.04	-0.20	0	normal	dry	clear	2	0.98	West-SouthWest, cyclonic, flat pressure distribution
1816	1	19	19	-2.25	-2.21	-0.43	2.82	normal	slight snowfall	partly cloudy	2	0.55	West-SouthWest, cyclonic, flat pressure distribution
1816	1	20	20	-1.92	-2.99	-0.59	0	cold	dry	clear	2	0.78	West-SouthWest, cyclonic, flat pressure distribution
1816	1	21	21	0.12	-0.42	-0.08	6.53	normal	snowfall	cloudy	7	0.94	Westerly flow over Southern Europe, cyclonic
1816	1	22	22	-1.83	-0.66	-0.13	0	normal	dry	cloudy	7	1.00	Westerly flow over Southern Europe, cyclonic
1816	1	23	23	-2.79	-1.59	-0.31	0	normal	dry	clear	7	1.00	Westerly flow over Southern Europe, cyclonic
1816	1	24	24	0.78	3.55	0.70	0	warm	dry	clear	7	0.99	Westerly flow over Southern Europe, cyclonic
1816	1	25	25	2.03	4.73	0.93	0	warm	dry	clear	7	1.00	Westerly flow over Southern Europe, cyclonic
1816	1	26	26	1.55	4.19	0.83	1.18	warm	slight snowfall	partly cloudy	7	1.00	Westerly flow over Southern Europe, cyclonic
1816	1	27	27	0.62	1.90	0.38	1.42	normal	slight snowfall	partly cloudy	7	0.91	Westerly flow over Southern Europe, cyclonic
1816	1	28	28	-1.47	-1.48	-0.29	0.02	normal	dry	cloudy	6	0.75	orth, cyclonic
1816	1	29	29	-8.86	-7.96	-1.57	0.25	very cold	dry	clear	1	0.94	Northeast, indifferent
1816	1	30	30	-11.17	-10.33	-2.05	0	very cold	dry	partly cloudy	4	0.65	East, indifferent
1816	1	31	31	-7.10	-5.44	-1.08	2.91	cold	slight snowfall	partly cloudy	5	0.97	High Pressure over Europe
1816	2	1	32	-9.58	-8.61	-1.71	9.35	very cold	snowfall	partly cloudy	5	0.95	High Pressure over Europe
1816	2	2	33	-8.39	-8.01	-1.59	9.96	very cold	snowfall	cloudy	3	0.44	Westerly flow over Northern Europe
1816	2	3	34	-1.74	-0.58	-0.12	0.02	normal	dry	partly cloudy	7	0.96	Westerly flow over Southern Europe, cyclonic
1816	2	4	35	2.17	2.53	0.51	0.23	warm	dry	clear	7	1.00	Westerly flow over Southern Europe, cyclonic
1816	2	5	36	1.80	2.78	0.56	22.26	warm	heavy snowfall	partly cloudy	7	1.00	Westerly flow over Southern Europe, cyclonic
1816	2	6	37	-0.57	1.33	0.27	0	normal	dry	clear	7	1.00	Westerly flow over Southern Europe, cyclonic
1816	2	7	38	1.20	1.54	0.31	12.38	normal	snowfall	partly cloudy	7	1.00	Westerly flow over Southern Europe, cyclonic
1816	2	8	39	0.06	1.16	0.23	1.11	normal	slight snowfall	partly cloudy	7	1.00	Westerly flow over Southern Europe, cyclonic
1816	2	9	40	-2.85	-3.36	-0.68	1.06	cold	slight snowfall	partly cloudy	7	1.00	Westerly flow over Southern Europe, cyclonic
1816	2	10	41	-9.05	-10.81	-2.18	0.81	very cold	dry	clear	7	0.96	Westerly flow over Southern Europe, cyclonic
1816	2	11	42	-8.29	-9.32	-1.88	0	very cold	dry	clear	1	1.00	Northeast, indifferent
1816	2	12	43	-9.65	-9.42	-1.91	4.81	very cold	slight snowfall	partly cloudy	1	0.94	Northeast, indifferent
1816	2	13	44	-8.75	-6.78	-1.38	4.68	cold	slight snowfall	partly cloudy	5	0.76	High Pressure over Europe
1816	2	14	45	-4.79	-3.84	-0.78	0.12	cold	dry	clear	5	0.79	High Pressure over Europe
1816	2	15	46	-2.87	-2.05	-0.42	0	normal	dry	clear	5	0.94	High Pressure over Europe
1816	2	16	47	1.39	2.67	0.54	0	warm	dry	cloudy	2	0.87	West-SouthWest, cyclonic, flat pressure distribution
1816	2	17	48	1.91	2.99	0.61	9.62	warm	snowfall	partly cloudy	7	1.00	Westerly flow over Southern Europe, cyclonic
1816	2	18	49	-5.43	-3.84	-0.79	3.23	cold	slight snowfall	partly cloudy	7	0.98	Westerly flow over Southern Europe, cyclonic
1816	2	19	50	-2.25	-1.55	-0.32	2.12	normal	slight snowfall	partly cloudy	1	0.61	Northeast, indifferent
1816	2	20	51	1.87	2.80	0.58	0	warm	dry	clear	3	0.66	Westerly flow over Northern Europe
1816	2	21	52	1.99	2.05	0.42	0	normal	dry	clear	5	0.99	High Pressure over Europe
1816	2	22	53	2.63	2.05	0.42	0.01	normal	dry	partly cloudy	5	1.00	High Pressure over Europe
1816	2	23	54	0.61	0.43	0.09	0	normal	dry	clear	5	1.00	High Pressure over Europe
1816	2	24	55	0.15	-0.35	-0.07	0.72	normal	dry	clear	5	1.00	High Pressure over Europe
1816	2	25	56	3.60	2.51	0.52	0	warm	dry	clear	5	1.00	High Pressure over Europe
1816	2	26	57	4.89	3.82	0.80	6.83	warm	rain	partly cloudy	3	0.97	Westerly flow over Northern Europe
1816	2	27	58	-0.46	-1.62	-0.34	0.02	normal	dry	clear	1	0.90	Northeast, indifferent
1816	2	28	59	2.53	0.40	0.08	0.63	normal	dry	clear	7	1.00	Westerly flow over Southern Europe, cyclonic
1816	2	29	60	NA	NA	NA	NA	extremely warm	NA	NA	7	0.86	Westerly flow over Southern Europe, cyclonic
1816	3	1	61	-3.66	-5.58	-1.18	4.83	cold	slight snowfall	partly cloudy	1	0.63	Northeast, indifferent
1816	3	2	62	-3.42	-5.72	-1.21	3.79	cold	slight snowfall	partly cloudy	3	1.00	Westerly flow over Northern Europe
1816	3	3	63	5.73	4.06	0.86	0	warm	dry	clear	7	0.60	Westerly flow over Southern Europe, cyclonic
1816	3	4	64	4.58	2.43	0.52	1.44	warm	slight rain	partly cloudy	7	1.00	Westerly flow over Southern Europe, cyclonic
1816	3	5	65	4.72	2.85	0.61	0.65	warm	dry	clear	7	1.00	Westerly flow over Southern Europe, cyclonic
1816	3	6	66	9.73	9.54	2.04	3.83	very warm	slight rain	partly cloudy	7	1.00	Westerly flow over Southern Europe, cyclonic
1816	3	7	67	7.03	7.13	1.53	26.68	very warm	heavy rain	cloudy	7	1.00	Westerly flow over Southern Europe, cyclonic
1816	3	8	68	1.02	0.97	0.21	2.85	normal	slight snowfall	partly cloudy	7	1.00	Westerly flow over Southern Europe, cyclonic
1816	3	9	69	0.18	-0.50	-0.11	2.77	normal	slight snowfall	partly cloudy	7	1.00	Westerly flow over Southern Europe, cyclonic
1816	3	10	70	-1.83	-3.28	-0.71	2.9	cold	slight snowfall	partly cloudy	7	0.95	Westerly flow over Southern Europe, cyclonic
1816	3	11	71	-3.01	-4.33	-0.94	0.14	cold	dry	clear	1	0.79	Northeast, indifferent
1816	3	12	72	1.67	0.78	0.17	0	normal	dry	clear	4	0.56	East, indifferent
1816	3	13	73	5.92	3.63	0.79	0.45	warm	dry	clear	3	0.96	Westerly flow over Northern Europe
1816	3	14	74	6.75	4.23	0.92	0	warm	dry	clear	5	0.84	High Pressure over Europe
1816	3	15	75	8.46	5.35	1.17	0	warm	dry	clear	2	0.93	West-SouthWest, cyclonic, flat pressure distribution
1816	3	16	76	0.61	-2.68	-0.59	0	cold	dry	clear	2	0.53	West-SouthWest, cyclonic, flat pressure distribution
1816	3	17	77	-1.15	-4.59	-1.01	0	cold	dry	clear	6	0.54	orth, cyclonic
1816	3	18	78	-0.14	-4.40	-0.97	9.9	cold	snowfall	partly cloudy	7	0.75	Westerly flow over Southern Europe, cyclonic
1816	3	19	79	2.34	-2.36	-0.52	9.53	cold	rain	partly cloudy	6	0.73	orth, cyclonic
1816	3	20	80	1.47	-3.09	-0.68	1	cold	slight snowfall	cloudy	6	0.73	orth, cyclonic
1816	3	21	81	1.72	-2.58	-0.57	0.82	cold	dry	clear	1	0.65	Northeast, indifferent
1816	3	22	82	-0.09	-3.60	-0.80	0	cold	dry	clear	1	0.96	Northeast, indifferent
1816	3	23	83	1.52	-2.22	-0.50	2.4	normal	slight snowfall	cloudy	1	0.85	Northeast, indifferent
1816	3	24	84	3.15	-0.71	-0.16	0	normal	dry	clear	4	0.96	East, indifferent
1816	3	25	85	2.38	-1.72	-0.38	2.25	normal	slight rain	partly cloudy	4	0.91	East, indifferent
1816	3	26	86	-0.23	-4.54	-1.02	0.17	cold	dry	clear	4	0.66	East, indifferent
1816	3	27	87	-1.32	-5.72	-1.29	0.17	cold	dry	clear	4	0.60	East, indifferent
1816	3	28	88	-5.38	-10.04	-2.27	16.58	very cold	heavy snowfall	cloudy	1	0.98	Northeast, indifferent
1816	3	29	89	-5.98	-11.09	-2.51	0.1	extremely cold	dry	clear	1	0.97	Northeast, indifferent
1816	3	30	90	-4.80	-9.92	-2.25	0.47	very cold	dry	partly cloudy	1	0.71	Northeast, indifferent
1816	3	31	91	-3.14	-9.14	-2.08	0.47	very cold	dry	partly cloudy	4	0.94	East, indifferent
1816	4	1	92	-0.39	-6.05	-1.38	11.03	cold	snowfall	cloudy	1	0.97	Northeast, indifferent
1816	4	2	93	-1.18	-9.02	-2.06	11.03	very cold	snowfall	cloudy	1	0.70	Northeast, indifferent
1816	4	3	94	1.11	-5.74	-1.31	12.64	cold	snowfall	partly cloudy	1	0.59	Northeast, indifferent
1816	4	4	95	1.59	-5.68	-1.30	0.57	cold	dry	clear	1	0.90	Northeast, indifferent
1816	4	5	96	6.08	-1.37	-0.31	0	normal	dry	clear	1	0.84	Northeast, indifferent
1816	4	6	97	9.83	2.31	0.53	0	warm	dry	clear	7	0.92	Westerly flow over Southern Europe, cyclonic
1816	4	7	98	10.06	1.81	0.42	0	normal	dry	clear	7	1.00	Westerly flow over Southern Europe, cyclonic
1816	4	8	99	7.25	-1.47	-0.34	0	normal	dry	clear	7	1.00	Westerly flow over Southern Europe, cyclonic
1816	4	9	100	10.84	1.63	0.38	7.76	normal	rain	partly cloudy	7	1.00	Westerly flow over Southern Europe, cyclonic
1816	4	10	101	12.82	3.65	0.85	9.2	warm	rain	partly cloudy	7	1.00	Westerly flow over Southern Europe, cyclonic
1816	4	11	102	14.46	5.04	1.17	28.31	warm	heavy rain	cloudy	7	0.98	Westerly flow over Southern Europe, cyclonic
1816	4	12	103	9.85	1.76	0.41	14.49	normal	rain	partly cloudy	6	0.71	orth, cyclonic
1816	4	13	104	6.80	-1.56	-0.36	12.72	normal	rain	partly cloudy	6	0.49	orth, cyclonic
1816	4	14	105	2.98	-5.41	-1.27	5.59	cold	rain	partly cloudy	7	1.00	Westerly flow over Southern Europe, cyclonic
1816	4	15	106	0.25	-9.45	-2.22	0.54	very cold	dry	clear	7	0.64	Westerly flow over Southern Europe, cyclonic
1816	4	16	107	4.37	-5.08	-1.19	13.26	cold	rain	partly cloudy	6	0.56	orth, cyclonic
1816	4	17	108	5.87	-3.43	-0.81	19.43	cold	heavy rain	partly cloudy	7	0.62	Westerly flow over Southern Europe, cyclonic
1816	4	18	109	9.83	1.13	0.27	27.43	normal	heavy rain	partly cloudy	7	0.77	Westerly flow over Southern Europe, cyclonic
1816	4	19	110	10.70	2.30	0.54	0	warm	dry	clear	2	0.61	West-SouthWest, cyclonic, flat pressure distribution
1816	4	20	111	7.87	-1.01	-0.24	42.52	normal	heavy rain	cloudy	3	0.54	Westerly flow over Northern Europe
1816	4	21	112	9.68	-0.04	-0.01	0.44	normal	dry	partly cloudy	1	0.78	Northeast, indifferent
1816	4	22	113	12.38	3.83	0.91	10	warm	rain	partly cloudy	2	0.94	West-SouthWest, cyclonic, flat pressure distribution
1816	4	23	114	10.12	2.35	0.56	0	warm	dry	partly cloudy	6	0.74	orth, cyclonic
1816	4	24	115	7.17	-1.73	-0.41	4.91	normal	slight rain	partly cloudy	6	0.93	orth, cyclonic
1816	4	25	116	6.23	-3.73	-0.89	4.9	cold	slight rain	cloudy	6	0.85	orth, cyclonic
1816	4	26	117	5.87	-3.01	-0.72	0	cold	dry	clear	1	0.85	Northeast, indifferent
1816	4	27	118	7.94	-1.61	-0.38	0	normal	dry	clear	6	0.62	orth, cyclonic
1816	4	28	119	5.83	-2.98	-0.71	0	cold	dry	clear	6	0.82	orth, cyclonic
1816	4	29	120	8.12	-0.71	-0.17	11.37	normal	rain	partly cloudy	7	0.42	Westerly flow over Southern Europe, cyclonic
1816	4	30	121	10.93	0.87	0.21	0.04	normal	dry	clear	7	0.91	Westerly flow over Southern Europe, cyclonic
1816	5	1	122	8.94	-2.17	-0.52	6.21	cold	rain	partly cloudy	7	0.57	Westerly flow over Southern Europe, cyclonic
1816	5	2	123	11.65	-1.03	-0.25	3.36	normal	slight rain	partly cloudy	6	0.84	orth, cyclonic
1816	5	3	124	8.92	-4.39	-1.06	0	cold	dry	clear	1	1.00	Northeast, indifferent
1816	5	4	125	6.02	-6.31	-1.52	1.8	very cold	slight rain	partly cloudy	1	1.00	Northeast, indifferent
1816	5	5	126	9.58	-2.13	-0.51	0	cold	dry	clear	6	0.81	orth, cyclonic
1816	5	6	127	11.23	-1.86	-0.45	9.56	normal	rain	partly cloudy	6	0.34	orth, cyclonic
1816	5	7	128	8.86	-4.40	-1.06	2.5	cold	slight rain	cloudy	6	1.00	orth, cyclonic
1816	5	8	129	10.90	-3.84	-0.93	8.62	cold	rain	cloudy	7	0.74	Westerly flow over Southern Europe, cyclonic
1816	5	9	130	9.33	-5.22	-1.26	0	cold	dry	clear	7	1.00	Westerly flow over Southern Europe, cyclonic
1816	5	10	131	6.21	-6.39	-1.55	2.5	very cold	slight rain	cloudy	7	0.78	Westerly flow over Southern Europe, cyclonic
1816	5	11	132	6.25	-5.17	-1.26	16.14	cold	heavy rain	cloudy	7	1.00	Westerly flow over Southern Europe, cyclonic
1816	5	12	133	5.22	-7.50	-1.82	16.14	very cold	heavy rain	cloudy	7	1.00	Westerly flow over Southern Europe, cyclonic
1816	5	13	134	1.87	-10.70	-2.60	16.14	extremely cold	heavy snowfall	cloudy	7	0.57	Westerly flow over Southern Europe, cyclonic
1816	5	14	135	5.38	-6.80	-1.66	2.5	very cold	slight rain	cloudy	1	0.60	Northeast, indifferent
1816	5	15	136	6.91	-5.25	-1.28	2.93	cold	slight rain	partly cloudy	1	1.00	Northeast, indifferent
1816	5	16	137	6.40	-5.80	-1.42	0	cold	dry	clear	6	1.00	orth, cyclonic
1816	5	17	138	10.47	-1.96	-0.48	0	normal	dry	clear	6	0.91	orth, cyclonic
1816	5	18	139	13.23	0.84	0.21	0	normal	dry	clear	6	0.84	orth, cyclonic
1816	5	19	140	14.28	0.89	0.22	1.38	normal	slight rain	partly cloudy	6	0.76	orth, cyclonic
1816	5	20	141	15.91	1.69	0.41	5.61	normal	rain	partly cloudy	6	0.44	orth, cyclonic
1816	5	21	142	16.00	1.95	0.48	0	normal	dry	clear	6	0.82	orth, cyclonic
1816	5	22	143	16.81	2.20	0.54	3.9	warm	slight rain	partly cloudy	6	0.94	orth, cyclonic
1816	5	23	144	15.05	0.77	0.19	0.16	normal	dry	clear	6	0.99	orth, cyclonic
1816	5	24	145	16.72	1.91	0.47	0	normal	dry	clear	6	0.52	orth, cyclonic
1816	5	25	146	14.81	1.36	0.33	0	normal	dry	clear	1	0.60	Northeast, indifferent
1816	5	26	147	10.45	-3.34	-0.82	0	cold	dry	clear	1	0.99	Northeast, indifferent
1816	5	27	148	10.04	-3.06	-0.76	0	cold	dry	clear	1	0.90	Northeast, indifferent
1816	5	28	149	10.82	-2.90	-0.72	8.89	cold	rain	partly cloudy	1	0.70	Northeast, indifferent
1816	5	29	150	12.11	-1.96	-0.48	8.89	normal	rain	partly cloudy	6	0.60	orth, cyclonic
1816	5	30	151	10.66	-3.07	-0.76	2.5	cold	slight rain	cloudy	6	0.43	orth, cyclonic
1816	5	31	152	9.91	-2.38	-0.59	8.89	cold	rain	partly cloudy	6	0.57	orth, cyclonic
1816	6	1	153	11.28	-1.36	-0.34	1.49	normal	slight rain	cloudy	6	0.80	orth, cyclonic
1816	6	2	154	11.40	-2.22	-0.55	1.56	cold	slight rain	cloudy	1	0.99	Northeast, indifferent
1816	6	3	155	13.87	-0.52	-0.13	4.79	normal	slight rain	partly cloudy	6	0.22	orth, cyclonic
1816	6	4	156	13.43	-1.72	-0.43	0	normal	dry	clear	1	0.66	Northeast, indifferent
1816	6	5	157	11.36	-2.77	-0.69	14.44	cold	rain	partly cloudy	7	0.97	Westerly flow over Southern Europe, cyclonic
1816	6	6	158	10.86	-4.35	-1.09	25.29	cold	heavy rain	partly cloudy	7	1.00	Westerly flow over Southern Europe, cyclonic
1816	6	7	159	8.24	-7.08	-1.77	25.29	very cold	heavy rain	partly cloudy	6	1.00	orth, cyclonic
1816	6	8	160	7.93	-7.16	-1.80	25.29	very cold	heavy rain	partly cloudy	7	1.00	Westerly flow over Southern Europe, cyclonic
1816	6	9	161	8.38	-6.27	-1.58	14.57	very cold	rain	cloudy	7	1.00	Westerly flow over Southern Europe, cyclonic
1816	6	10	162	9.62	-5.35	-1.35	14.57	cold	rain	cloudy	7	1.00	Westerly flow over Southern Europe, cyclonic
1816	6	11	163	6.30	-8.91	-2.25	1.9	very cold	slight rain	partly cloudy	2	0.78	West-SouthWest, cyclonic, flat pressure distribution
1816	6	12	164	10.84	-4.23	-1.07	0	cold	dry	clear	6	0.27	orth, cyclonic
1816	6	13	165	15.50	-0.12	-0.03	0.03	normal	dry	clear	1	0.92	Northeast, indifferent
1816	6	14	166	15.64	0.50	0.13	3.01	normal	slight rain	partly cloudy	2	0.79	West-SouthWest, cyclonic, flat pressure distribution
1816	6	15	167	14.37	-0.27	-0.07	11.29	normal	rain	partly cloudy	2	0.72	West-SouthWest, cyclonic, flat pressure distribution
1816	6	16	168	12.36	-1.83	-0.47	6.93	normal	rain	partly cloudy	6	0.62	orth, cyclonic
1816	6	17	169	7.78	-6.09	-1.55	43.88	very cold	heavy rain	partly cloudy	6	0.61	orth, cyclonic
1816	6	18	170	9.30	-5.66	-1.44	20.81	cold	heavy rain	cloudy	6	0.98	orth, cyclonic
1816	6	19	171	11.08	-2.93	-0.75	1.08	cold	slight rain	partly cloudy	6	0.63	orth, cyclonic
1816	6	20	172	11.67	-3.01	-0.77	0.19	cold	dry	clear	6	0.53	orth, cyclonic
1816	6	21	173	9.02	-4.14	-1.06	0	cold	dry	clear	6	0.24	orth, cyclonic
1816	6	22	174	10.28	-2.17	-0.56	22.02	cold	heavy rain	partly cloudy	1	0.91	Northeast, indifferent
1816	6	23	175	11.68	-1.11	-0.29	39.32	normal	heavy rain	cloudy	2	0.50	West-SouthWest, cyclonic, flat pressure distribution
1816	6	24	176	10.64	-2.86	-0.74	0	cold	dry	clear	6	0.93	orth, cyclonic
1816	6	25	177	10.17	-4.64	-1.20	4.3	cold	slight rain	cloudy	6	1.00	orth, cyclonic
1816	6	26	178	11.25	-5.47	-1.42	4.3	cold	slight rain	cloudy	6	0.98	orth, cyclonic
1816	6	27	179	11.62	-5.02	-1.30	28.08	cold	heavy rain	partly cloudy	7	0.90	Westerly flow over Southern Europe, cyclonic
1816	6	28	180	11.49	-4.59	-1.19	16.17	cold	heavy rain	partly cloudy	6	0.97	orth, cyclonic
1816	6	29	181	10.58	-5.55	-1.45	2.37	cold	slight rain	partly cloudy	6	0.62	orth, cyclonic
1816	6	30	182	13.48	-2.86	-0.75	6.17	cold	rain	cloudy	6	0.70	orth, cyclonic
1816	7	1	183	14.97	-2.37	-0.62	43.88	cold	heavy rain	partly cloudy	7	0.35	Westerly flow over Southern Europe, cyclonic
1816	7	2	184	10.37	-7.23	-1.90	1.9	very cold	slight rain	partly cloudy	6	0.95	orth, cyclonic
1816	7	3	185	11.07	-6.26	-1.65	6.59	very cold	rain	cloudy	6	0.99	orth, cyclonic
1816	7	4	186	12.64	-4.30	-1.13	0	cold	dry	clear	6	0.32	orth, cyclonic
1816	7	5	187	12.66	-3.44	-0.91	1.9	cold	slight rain	partly cloudy	2	0.69	West-SouthWest, cyclonic, flat pressure distribution
1816	7	6	188	12.11	-5.31	-1.41	14.36	cold	rain	cloudy	2	0.85	West-SouthWest, cyclonic, flat pressure distribution
1816	7	7	189	15.61	-0.93	-0.25	20.81	normal	heavy rain	cloudy	7	0.29	Westerly flow over Southern Europe, cyclonic
1816	7	8	190	20.86	3.76	1.00	17.18	warm	heavy rain	partly cloudy	6	0.49	orth, cyclonic
1816	7	9	191	20.78	3.58	0.96	0	warm	dry	clear	7	0.29	Westerly flow over Southern Europe, cyclonic
1816	7	10	192	19.06	2.11	0.56	1.22	warm	slight rain	partly cloudy	7	0.90	Westerly flow over Southern Europe, cyclonic
1816	7	11	193	15.61	-1.81	-0.49	25.29	normal	heavy rain	partly cloudy	6	0.82	orth, cyclonic
1816	7	12	194	14.84	-2.20	-0.59	25.29	cold	heavy rain	partly cloudy	7	1.00	Westerly flow over Southern Europe, cyclonic
1816	7	13	195	13.31	-3.57	-0.96	12.4	cold	rain	partly cloudy	6	0.98	orth, cyclonic
1816	7	14	196	10.73	-5.35	-1.45	7.28	cold	rain	partly cloudy	2	0.69	West-SouthWest, cyclonic, flat pressure distribution
1816	7	15	197	14.37	-2.05	-0.55	6.33	cold	rain	partly cloudy	7	0.43	Westerly flow over Southern Europe, cyclonic
1816	7	16	198	11.55	-4.51	-1.23	43.88	cold	heavy rain	partly cloudy	7	0.39	Westerly flow over Southern Europe, cyclonic
1816	7	17	199	8.78	-6.87	-1.87	25.29	very cold	heavy rain	partly cloudy	7	0.91	Westerly flow over Southern Europe, cyclonic
1816	7	18	200	14.48	-0.35	-0.10	5.26	normal	rain	partly cloudy	7	0.76	Westerly flow over Southern Europe, cyclonic
1816	7	19	201	17.24	1.37	0.38	2.09	normal	slight rain	partly cloudy	2	0.99	West-SouthWest, cyclonic, flat pressure distribution
1816	7	20	202	15.12	-1.66	-0.46	2.38	normal	slight rain	partly cloudy	2	0.97	West-SouthWest, cyclonic, flat pressure distribution
1816	7	21	203	19.16	2.13	0.59	2.27	warm	slight rain	partly cloudy	7	0.25	Westerly flow over Southern Europe, cyclonic
1816	7	22	204	15.93	-1.05	-0.29	0	normal	dry	clear	6	0.64	orth, cyclonic
1816	7	23	205	14.83	-2.34	-0.65	0	cold	dry	partly cloudy	7	0.52	Westerly flow over Southern Europe, cyclonic
1816	7	24	206	14.44	-1.55	-0.43	12.92	normal	rain	partly cloudy	7	0.55	Westerly flow over Southern Europe, cyclonic
1816	7	25	207	11.19	-5.62	-1.57	2.78	very cold	slight rain	partly cloudy	7	0.18	Westerly flow over Southern Europe, cyclonic
1816	7	26	208	11.22	-5.55	-1.55	12.4	very cold	rain	partly cloudy	6	0.51	orth, cyclonic
1816	7	27	209	11.89	-6.31	-1.77	5.96	very cold	rain	partly cloudy	1	0.69	Northeast, indifferent
1816	7	28	210	16.54	-0.67	-0.19	21.39	normal	heavy rain	partly cloudy	2	0.91	West-SouthWest, cyclonic, flat pressure distribution
1816	7	29	211	18.38	0.45	0.13	0.5	normal	dry	clear	7	1.00	Westerly flow over Southern Europe, cyclonic
1816	7	30	212	12.75	-5.56	-1.57	15.1	very cold	heavy rain	partly cloudy	7	1.00	Westerly flow over Southern Europe, cyclonic
1816	7	31	213	13.29	-5.38	-1.52	16.05	very cold	heavy rain	cloudy	7	1.00	Westerly flow over Southern Europe, cyclonic
1816	8	1	214	14.93	-4.29	-1.22	3.58	cold	slight rain	partly cloudy	7	0.93	Westerly flow over Southern Europe, cyclonic
1816	8	2	215	13.16	-5.49	-1.56	12.4	very cold	rain	partly cloudy	2	0.87	West-SouthWest, cyclonic, flat pressure distribution
1816	8	3	216	17.99	0.22	0.06	13.1	normal	rain	cloudy	2	0.65	West-SouthWest, cyclonic, flat pressure distribution
1816	8	4	217	17.41	-0.55	-0.16	0	normal	dry	clear	2	0.98	West-SouthWest, cyclonic, flat pressure distribution
1816	8	5	218	16.78	-0.95	-0.27	0	normal	dry	clear	2	0.92	West-SouthWest, cyclonic, flat pressure distribution
1816	8	6	219	16.08	-1.84	-0.53	1.34	cold	slight rain	partly cloudy	1	0.99	Northeast, indifferent
1816	8	7	220	16.26	-1.73	-0.50	0.86	normal	dry	clear	1	0.78	Northeast, indifferent
1816	8	8	221	16.83	-1.17	-0.34	3.58	normal	slight rain	partly cloudy	2	0.92	West-SouthWest, cyclonic, flat pressure distribution
1816	8	9	222	22.03	4.10	1.19	2.27	warm	slight rain	partly cloudy	2	0.82	West-SouthWest, cyclonic, flat pressure distribution
1816	8	10	223	16.81	-0.73	-0.21	1.34	normal	slight rain	partly cloudy	6	0.69	orth, cyclonic
1816	8	11	224	14.77	-2.86	-0.83	0	cold	dry	clear	4	0.97	East, indifferent
1816	8	12	225	16.72	-0.88	-0.26	0	normal	dry	clear	4	0.83	East, indifferent
1816	8	13	226	18.28	1.08	0.31	3.7	normal	slight rain	partly cloudy	1	0.73	Northeast, indifferent
1816	8	14	227	19.63	2.17	0.64	7.68	warm	rain	partly cloudy	2	0.94	West-SouthWest, cyclonic, flat pressure distribution
1816	8	15	228	19.17	1.51	0.44	0	normal	dry	clear	7	0.76	Westerly flow over Southern Europe, cyclonic
1816	8	16	229	14.69	-2.19	-0.64	37.14	cold	heavy rain	cloudy	7	0.60	Westerly flow over Southern Europe, cyclonic
1816	8	17	230	12.02	-5.52	-1.63	7.99	very cold	rain	cloudy	6	0.51	orth, cyclonic
1816	8	18	231	8.83	-8.26	-2.44	1.7	very cold	slight rain	partly cloudy	6	0.99	orth, cyclonic
1816	8	19	232	8.48	-9.20	-2.72	19.1	extremely cold	heavy rain	partly cloudy	1	0.93	Northeast, indifferent
1816	8	20	233	10.45	-7.25	-2.15	0.02	very cold	dry	clear	1	0.72	Northeast, indifferent
1816	8	21	234	13.20	-3.51	-1.04	16.24	cold	heavy rain	partly cloudy	1	0.95	Northeast, indifferent
1816	8	22	235	11.35	-4.39	-1.30	1.39	cold	slight rain	partly cloudy	1	0.99	Northeast, indifferent
1816	8	23	236	11.32	-4.08	-1.21	0	cold	dry	clear	1	0.99	Northeast, indifferent
1816	8	24	237	9.06	-7.62	-2.27	15.01	very cold	heavy rain	cloudy	1	0.97	Northeast, indifferent
1816	8	25	238	10.08	-7.06	-2.11	15.01	very cold	heavy rain	cloudy	1	0.99	Northeast, indifferent
1816	8	26	239	9.98	-6.89	-2.06	1.39	very cold	slight rain	partly cloudy	1	0.99	Northeast, indifferent
1816	8	27	240	9.82	-6.48	-1.94	16.24	very cold	heavy rain	partly cloudy	1	0.98	Northeast, indifferent
1816	8	28	241	12.73	-3.75	-1.12	7.04	cold	rain	partly cloudy	3	0.55	Westerly flow over Northern Europe
1816	8	29	242	15.19	-1.69	-0.50	0	cold	dry	partly cloudy	4	0.62	East, indifferent
1816	8	30	243	14.45	-2.50	-0.75	11.57	cold	rain	partly cloudy	2	0.88	West-SouthWest, cyclonic, flat pressure distribution
1816	8	31	244	13.47	-3.59	-1.08	0.54	cold	dry	clear	7	1.00	Westerly flow over Southern Europe, cyclonic
1816	9	1	245	12.19	-4.07	-1.22	16.05	cold	heavy rain	cloudy	7	1.00	Westerly flow over Southern Europe, cyclonic
1816	9	2	246	11.59	-4.08	-1.22	14.11	cold	rain	cloudy	7	1.00	Westerly flow over Southern Europe, cyclonic
1816	9	3	247	6.34	-9.58	-2.88	50.93	extremely cold	heavy rain	cloudy	1	0.97	Northeast, indifferent
1816	9	4	248	11.33	-4.27	-1.28	14.11	cold	rain	cloudy	2	0.53	West-SouthWest, cyclonic, flat pressure distribution
1816	9	5	249	11.70	-4.56	-1.37	1.7	cold	slight rain	partly cloudy	1	0.95	Northeast, indifferent
1816	9	6	250	14.31	-2.14	-0.64	11.28	cold	rain	partly cloudy	1	0.96	Northeast, indifferent
1816	9	7	251	13.52	-2.11	-0.63	0.07	cold	dry	partly cloudy	1	0.92	Northeast, indifferent
1816	9	8	252	13.76	-0.79	-0.24	0.02	normal	dry	clear	1	0.53	Northeast, indifferent
1816	9	9	253	13.70	-0.68	-0.20	0	normal	dry	clear	2	0.55	West-SouthWest, cyclonic, flat pressure distribution
1816	9	10	254	19.38	5.35	1.60	0	very warm	dry	clear	3	0.82	Westerly flow over Northern Europe
1816	9	11	255	16.35	2.75	0.82	0	warm	dry	clear	3	0.94	Westerly flow over Northern Europe
1816	9	12	256	15.17	1.78	0.53	0.02	warm	dry	clear	1	0.49	Northeast, indifferent
1816	9	13	257	10.45	-1.99	-0.59	0	cold	dry	clear	4	0.91	East, indifferent
1816	9	14	258	9.36	-3.36	-1.00	0.16	cold	dry	clear	4	0.87	East, indifferent
1816	9	15	259	12.63	-1.68	-0.50	2.55	cold	slight rain	partly cloudy	3	0.99	Westerly flow over Northern Europe
1816	9	16	260	16.72	2.19	0.65	0	warm	dry	clear	3	0.98	Westerly flow over Northern Europe
1816	9	17	261	17.80	2.59	0.77	0	warm	dry	clear	3	0.86	Westerly flow over Northern Europe
1816	9	18	262	19.34	4.40	1.31	0.02	warm	dry	partly cloudy	3	0.96	Westerly flow over Northern Europe
1816	9	19	263	15.47	0.28	0.08	0.3	normal	dry	clear	2	0.41	West-SouthWest, cyclonic, flat pressure distribution
1816	9	20	264	9.88	-4.14	-1.22	0	cold	dry	clear	1	0.99	Northeast, indifferent
1816	9	21	265	14.10	0.38	0.11	0	normal	dry	clear	2	0.97	West-SouthWest, cyclonic, flat pressure distribution
1816	9	22	266	13.16	0.39	0.11	11.56	normal	rain	partly cloudy	2	0.97	West-SouthWest, cyclonic, flat pressure distribution
1816	9	23	267	13.25	0.53	0.16	1.49	normal	slight rain	partly cloudy	1	0.62	Northeast, indifferent
1816	9	24	268	13.44	1.24	0.36	14.06	normal	rain	cloudy	2	0.66	West-SouthWest, cyclonic, flat pressure distribution
1816	9	25	269	11.24	-0.99	-0.29	4.3	normal	slight rain	partly cloudy	1	0.96	Northeast, indifferent
1816	9	26	270	11.72	0.09	0.03	0	normal	dry	clear	4	0.79	East, indifferent
1816	9	27	271	10.36	-1.98	-0.58	1.51	cold	slight rain	partly cloudy	4	0.52	East, indifferent
1816	9	28	272	9.27	-3.42	-0.99	0.38	cold	dry	clear	4	0.73	East, indifferent
1816	9	29	273	10.56	-1.79	-0.52	0.02	cold	dry	clear	3	1.00	Westerly flow over Northern Europe
1816	9	30	274	14.23	1.63	0.47	0	normal	dry	clear	7	1.00	Westerly flow over Southern Europe, cyclonic
1816	10	1	275	9.64	-2.45	-0.70	1.02	cold	slight rain	partly cloudy	7	0.56	Westerly flow over Southern Europe, cyclonic
1816	10	2	276	10.62	-0.50	-0.14	0.59	normal	dry	clear	2	0.92	West-SouthWest, cyclonic, flat pressure distribution
1816	10	3	277	11.38	1.11	0.32	0	normal	dry	clear	6	0.37	orth, cyclonic
1816	10	4	278	9.85	-1.08	-0.31	1.61	normal	slight rain	partly cloudy	3	0.97	Westerly flow over Northern Europe
1816	10	5	279	11.59	0.39	0.11	0.02	normal	dry	clear	5	0.85	High Pressure over Europe
1816	10	6	280	11.06	0.22	0.06	2.34	normal	slight rain	cloudy	5	0.69	High Pressure over Europe
1816	10	7	281	16.97	5.29	1.48	0.02	warm	dry	cloudy	1	0.36	Northeast, indifferent
1816	10	8	282	15.71	4.01	1.12	8.83	warm	rain	partly cloudy	3	0.46	Westerly flow over Northern Europe
1816	10	9	283	13.20	2.66	0.74	0.03	warm	dry	partly cloudy	4	0.56	East, indifferent
1816	10	10	284	10.91	1.20	0.33	3.03	normal	slight rain	partly cloudy	5	0.59	High Pressure over Europe
1816	10	11	285	9.85	1.13	0.31	0.17	normal	dry	clear	1	0.82	Northeast, indifferent
1816	10	12	286	7.55	-0.66	-0.18	7.46	normal	rain	cloudy	1	0.58	Northeast, indifferent
1816	10	13	287	6.86	-0.55	-0.15	6.65	normal	rain	cloudy	5	0.66	High Pressure over Europe
1816	10	14	288	5.97	-0.76	-0.21	0	normal	dry	clear	5	0.96	High Pressure over Europe
1816	10	15	289	5.68	-1.76	-0.48	6.65	normal	rain	cloudy	4	0.89	East, indifferent
1816	10	16	290	4.79	-2.72	-0.73	0	cold	dry	partly cloudy	4	0.68	East, indifferent
1816	10	17	291	6.36	-1.87	-0.50	0	cold	dry	partly cloudy	1	0.64	Northeast, indifferent
1816	10	18	292	7.75	0.06	0.02	3.76	normal	slight rain	partly cloudy	6	0.51	orth, cyclonic
1816	10	19	293	4.36	-2.07	-0.55	0.01	cold	dry	clear	1	0.80	Northeast, indifferent
1816	10	20	294	2.11	-4.04	-1.07	3.8	cold	slight rain	cloudy	6	0.38	orth, cyclonic
1816	10	21	295	-0.43	-8.01	-2.11	0.01	very cold	dry	clear	7	1.00	Westerly flow over Southern Europe, cyclonic
1816	10	22	296	-0.03	-8.45	-2.22	21.03	very cold	heavy snowfall	cloudy	6	1.00	orth, cyclonic
1816	10	23	297	2.97	-3.74	-0.98	1.67	cold	slight rain	partly cloudy	6	0.98	orth, cyclonic
1816	10	24	298	2.77	-4.70	-1.22	1.89	cold	slight rain	partly cloudy	1	0.62	Northeast, indifferent
1816	10	25	299	5.90	-0.99	-0.26	0	normal	dry	partly cloudy	2	0.81	West-SouthWest, cyclonic, flat pressure distribution
1816	10	26	300	4.04	-1.83	-0.47	0.05	normal	dry	clear	3	0.56	Westerly flow over Northern Europe
1816	10	27	301	6.15	-1.57	-0.40	0.02	normal	dry	clear	2	0.91	West-SouthWest, cyclonic, flat pressure distribution
1816	10	28	302	3.72	-3.32	-0.84	0	cold	dry	partly cloudy	2	0.84	West-SouthWest, cyclonic, flat pressure distribution
1816	10	29	303	3.44	-3.29	-0.83	4.97	cold	slight rain	partly cloudy	2	0.72	West-SouthWest, cyclonic, flat pressure distribution
1816	10	30	304	5.69	-0.73	-0.18	16.57	normal	heavy rain	partly cloudy	7	1.00	Westerly flow over Southern Europe, cyclonic
1816	10	31	305	5.22	-0.57	-0.14	11.73	normal	rain	partly cloudy	7	1.00	Westerly flow over Southern Europe, cyclonic
1816	11	1	306	7.29	1.98	0.49	16.37	normal	heavy rain	partly cloudy	7	0.85	Westerly flow over Southern Europe, cyclonic
1816	11	2	307	6.54	0.06	0.01	3.25	normal	slight rain	partly cloudy	6	0.52	orth, cyclonic
1816	11	3	308	4.79	-0.69	-0.17	0.02	normal	dry	clear	2	0.64	West-SouthWest, cyclonic, flat pressure distribution
1816	11	4	309	4.58	-0.27	-0.07	0.04	normal	dry	cloudy	2	0.89	West-SouthWest, cyclonic, flat pressure distribution
1816	11	5	310	5.88	0.85	0.21	3.31	normal	slight rain	partly cloudy	1	0.74	Northeast, indifferent
1816	11	6	311	10.81	5.73	1.39	0	warm	dry	clear	7	0.60	Westerly flow over Southern Europe, cyclonic
1816	11	7	312	5.51	-0.34	-0.08	0.11	normal	dry	partly cloudy	7	1.00	Westerly flow over Southern Europe, cyclonic
1816	11	8	313	5.95	0.12	0.03	0.89	normal	dry	cloudy	7	1.00	Westerly flow over Southern Europe, cyclonic
1816	11	9	314	1.64	-3.64	-0.87	0.01	cold	dry	cloudy	7	0.90	Westerly flow over Southern Europe, cyclonic
1816	11	10	315	3.68	-1.63	-0.39	18.48	normal	heavy rain	cloudy	7	1.00	Westerly flow over Southern Europe, cyclonic
1816	11	11	316	-1.33	-5.98	-1.41	1.67	cold	slight snowfall	partly cloudy	6	0.55	orth, cyclonic
1816	11	12	317	-0.13	-5.01	-1.18	0.01	cold	dry	clear	7	0.95	Westerly flow over Southern Europe, cyclonic
1816	11	13	318	3.20	-1.98	-0.46	6.36	normal	rain	cloudy	2	0.89	West-SouthWest, cyclonic, flat pressure distribution
1816	11	14	319	7.92	3.07	0.71	2.19	warm	slight rain	partly cloudy	2	1.00	West-SouthWest, cyclonic, flat pressure distribution
1816	11	15	320	2.27	-2.87	-0.66	0.3	cold	dry	clear	7	1.00	Westerly flow over Southern Europe, cyclonic
1816	11	16	321	-4.36	-9.48	-2.18	1.67	very cold	slight snowfall	partly cloudy	7	1.00	Westerly flow over Southern Europe, cyclonic
1816	11	17	322	-0.50	-6.81	-1.56	0.02	very cold	dry	clear	1	0.55	Northeast, indifferent
1816	11	18	323	-4.22	-9.23	-2.11	15.5	very cold	heavy snowfall	cloudy	3	0.35	Westerly flow over Northern Europe
1816	11	19	324	1.61	-3.73	-0.85	0.06	cold	dry	clear	5	0.71	High Pressure over Europe
1816	11	20	325	3.68	-2.58	-0.58	0.38	cold	dry	partly cloudy	5	1.00	High Pressure over Europe
1816	11	21	326	-4.02	-8.61	-1.94	0.08	very cold	dry	cloudy	5	1.00	High Pressure over Europe
1816	11	22	327	-2.13	-6.21	-1.39	0.08	cold	dry	cloudy	5	0.99	High Pressure over Europe
1816	11	23	328	0.11	-4.52	-1.01	0	cold	dry	partly cloudy	2	0.70	West-SouthWest, cyclonic, flat pressure distribution
1816	11	24	329	8.15	2.53	0.56	0	warm	dry	partly cloudy	1	1.00	Northeast, indifferent
1816	11	25	330	2.67	-2.08	-0.46	5.59	normal	rain	partly cloudy	1	0.94	Northeast, indifferent
1816	11	26	331	-0.87	-4.94	-1.08	5.59	cold	snowfall	partly cloudy	1	0.25	Northeast, indifferent
1816	11	27	332	1.43	-1.79	-0.39	0.03	normal	dry	cloudy	4	0.93	East, indifferent
1816	11	28	333	0.32	-2.57	-0.56	0	cold	dry	clear	7	1.00	Westerly flow over Southern Europe, cyclonic
1816	11	29	334	0.97	-2.47	-0.53	2.19	cold	slight snowfall	partly cloudy	7	0.97	Westerly flow over Southern Europe, cyclonic
1816	11	30	335	-2.71	-5.62	-1.21	2.38	cold	slight snowfall	partly cloudy	5	0.66	High Pressure over Europe
1816	12	1	336	-5.37	-7.81	-1.68	0.01	very cold	dry	cloudy	4	0.99	East, indifferent
1816	12	2	337	-9.61	-11.00	-2.36	0.01	very cold	dry	cloudy	5	1.00	High Pressure over Europe
1816	12	3	338	-6.23	-6.45	-1.38	0	cold	dry	partly cloudy	5	1.00	High Pressure over Europe
1816	12	4	339	-4.84	-4.73	-1.00	0.02	cold	dry	clear	4	0.78	East, indifferent
1816	12	5	340	-3.03	-4.42	-0.94	2.38	cold	slight snowfall	partly cloudy	5	0.87	High Pressure over Europe
1816	12	6	341	-0.48	-2.27	-0.48	0	normal	dry	clear	6	0.98	orth, cyclonic
1816	12	7	342	-2.09	-3.89	-0.82	1.51	cold	slight snowfall	partly cloudy	6	0.97	orth, cyclonic
1816	12	8	343	-1.50	-2.92	-0.61	3.05	cold	slight snowfall	partly cloudy	1	0.41	Northeast, indifferent
1816	12	9	344	1.22	-0.49	-0.10	0.12	normal	dry	cloudy	3	0.75	Westerly flow over Northern Europe
1816	12	10	345	-1.25	-2.68	-0.56	0.01	cold	dry	clear	2	0.49	West-SouthWest, cyclonic, flat pressure distribution
1816	12	11	346	5.46	3.46	0.72	5.95	warm	rain	partly cloudy	2	0.51	West-SouthWest, cyclonic, flat pressure distribution
1816	12	12	347	2.50	1.96	0.41	20.83	normal	heavy rain	partly cloudy	7	0.95	Westerly flow over Southern Europe, cyclonic
1816	12	13	348	8.26	8.44	1.74	14.45	very warm	rain	partly cloudy	7	1.00	Westerly flow over Southern Europe, cyclonic
1816	12	14	349	4.45	4.28	0.88	6.77	warm	rain	cloudy	7	1.00	Westerly flow over Southern Europe, cyclonic
1816	12	15	350	2.75	3.07	0.63	0	warm	dry	clear	7	0.97	Westerly flow over Southern Europe, cyclonic
1816	12	16	351	3.38	4.46	0.91	5.91	warm	rain	partly cloudy	7	0.97	Westerly flow over Southern Europe, cyclonic
1816	12	17	352	3.88	4.86	0.99	0.01	warm	dry	clear	7	0.98	Westerly flow over Southern Europe, cyclonic
1816	12	18	353	7.24	7.72	1.57	16.37	very warm	heavy rain	partly cloudy	7	1.00	Westerly flow over Southern Europe, cyclonic
1816	12	19	354	1.18	2.55	0.52	0.02	warm	dry	partly cloudy	6	0.80	orth, cyclonic
1816	12	20	355	-4.99	-4.06	-0.82	0.37	cold	dry	cloudy	4	0.98	East, indifferent
1816	12	21	356	-6.84	-6.87	-1.39	0.25	cold	dry	clear	4	0.42	East, indifferent
1816	12	22	357	-4.14	-4.52	-0.91	0.03	cold	dry	clear	4	0.42	East, indifferent
1816	12	23	358	-4.15	-5.08	-1.02	3.62	cold	slight snowfall	cloudy	4	0.53	East, indifferent
1816	12	24	359	1.62	0.63	0.13	0.87	normal	dry	partly cloudy	3	0.98	Westerly flow over Northern Europe
1816	12	25	360	0.07	0.86	0.17	0.04	normal	dry	partly cloudy	3	0.60	Westerly flow over Northern Europe
1816	12	26	361	-2.21	-2.13	-0.43	0	normal	dry	clear	3	0.91	Westerly flow over Northern Europe
1816	12	27	362	2.16	2.17	0.43	2.6	normal	slight rain	partly cloudy	3	0.75	Westerly flow over Northern Europe
1816	12	28	363	0.02	-0.83	-0.16	0.58	normal	dry	clear	3	0.59	Westerly flow over Northern Europe
1816	12	29	364	4.50	4.21	0.84	0.71	warm	dry	partly cloudy	3	0.95	Westerly flow over Northern Europe
1816	12	30	365	4.29	4.33	0.86	0	warm	dry	clear	3	0.52	Westerly flow over Northern Europe
1816	12	31	366	3.25	4.04	0.80	0	warm	dry	clear	3	0.47	Westerly flow over Northern Europe
